# Supplementary material
Source: PubMed Central journal article supplement (PMC7960281)
Supplement: 15-01268.pdf [file 15-01268.pdf]

## ON-LINE APPENDIX

### **Detailed Search Strategies and Eligibility Criteria**

MEDLINE. Spinocerebellar ataxia\* OR SCA OR autosomal dominant cerebellar ataxia\* AND Magnetic Resonance Imaging OR MR imaging OR NMR OR spectroscopy OR volumetry OR morphometry OR gray matter atrophy OR regional atrophy OR white matter atrophy OR DTI OR tractography OR diffusion tensor.

Cochrane. Spinocerebellar ataxia AND Magnetic Resonance Imaging.

LILACS. MR imaging OR MR imaging AND SCA OR spinocerebellar ataxia.

### **Eligibility Criteria**

First phase (articles reviewed at the abstract).

### **Inclusion Criteria**

**Population.** 1) Symptomatic individuals with a molecular diagnosis of a dominant PolyQ-SCA (SCA1, SCA2, SCA3, SCA6, and SCA7); 2) asymptomatic carriers of dominant PolyQ-SCA mutation; 3)  $\geq 20$  individuals per group in symptomatic patients; and 4)  $\geq 10$  individuals per group in asymptomatic carriers.

### **Exclusion Criteria**

- 1) Study design: case report and review studies
- 2) Absence of molecular diagnosis of PolyQ-SCA mutations
- 3) Fewer than 20 individuals per group in symptomatic patients

4) Fewer than 10 individuals per group in asymptomatic carriers.

### **Second Phase**

**Inclusion Criteria.** 1) Population: symptomatic individuals with a molecular diagnosis of a dominant PolyQ-SCA (SCA1, SCA2, SCA3, SCA6, and SCA7); asymptomatic carriers of dominant PolyQ-SCA mutation;  $\geq 20$  individuals per group in symptomatic patients;  $\geq 10$  individuals per group in asymptomatic carriers; the group of patients representing  $>5$  different families; prospective studies with  $\geq 15$  individuals and studies on presymptomatic individuals with  $\geq 10$  subjects; at least 1 of the following about studied subjects: age, age at disease onset, CAG repeat length on the expanded allele, or scores obtained from a validated ataxia scale should be reported.

2) Study design: systematic review, randomized clinical trial, cohort, case-control, or case series

3) Equipment and imaging protocols

4) CNS MR imaging with  $\geq 1.5T$  field

5) Image processing by using volumetric analysis, MR spectroscopy, diffusion tensor imaging, tractography, or other MR imaging quantitative techniques.

**Exclusion Criteria.** 1) Study design: case reports or reviews, other than systematic; 2) population: absence of a healthy control group;  $<20$  individuals per group; group of patients representing  $<5$  different families; and 3) equipment and imaging protocols: qualitative CNS MR imaging analysis, neuroimaging studies other than MR imaging, and MR imaging with  $<1.5T$  field.

**On-line Table 1: Main infratentorial findings**

| Study                                                                            | SCA      | No. | Brain Stem |                                                                                                                         |                                                                                                                         |                                                                                                                         |                                                                                                                         |                                                                                                                         |                                                                                                                         |                                                                                                                         |                                                                                                                         |                                                                                                                         |                                                                                                                         |
|----------------------------------------------------------------------------------|----------|-----|------------|-------------------------------------------------------------------------------------------------------------------------|-------------------------------------------------------------------------------------------------------------------------|-------------------------------------------------------------------------------------------------------------------------|-------------------------------------------------------------------------------------------------------------------------|-------------------------------------------------------------------------------------------------------------------------|-------------------------------------------------------------------------------------------------------------------------|-------------------------------------------------------------------------------------------------------------------------|-------------------------------------------------------------------------------------------------------------------------|-------------------------------------------------------------------------------------------------------------------------|-------------------------------------------------------------------------------------------------------------------------|
|                                                                                  |          |     | Total      | Hemispheres                                                                                                             | Vermis                                                                                                                  | Cerebellum                                                                                                              |                                                                                                                         |                                                                                                                         | Brain Stem                                                                                                              |                                                                                                                         |                                                                                                                         |                                                                                                                         |                                                                                                                         |
|                                                                                  |          |     | Total      | Hemispheres                                                                                                             | Vermis                                                                                                                  | Dentate                                                                                                                 | Peduncle                                                                                                                | Other Nuclei                                                                                                            | Total                                                                                                                   | Midbrain                                                                                                                | Pons                                                                                                                    | Medulla Oblongata                                                                                                       | Cervical Spine                                                                                                          |
| <b>VBM</b>                                                                       |          |     |            |                                                                                                                         |                                                                                                                         |                                                                                                                         |                                                                                                                         |                                                                                                                         |                                                                                                                         |                                                                                                                         |                                                                                                                         |                                                                                                                         |                                                                                                                         |
| Della Nave et al. 2008 <sup>18</sup> (SPM2; 1.5T); cross-sectional               | SCA2     | 20  | GM         | ↓ <sup>ab</sup> ICARS; R = -0.53<br>↓ <sup>ab</sup> ICARS; R = -0.54                                                    | ↓ <sup>ab</sup> ICARS; R = -0.53<br>=                                                                                   | NA                                                                                                                      | ↓ <sup>ab</sup> ICARS; R = -0.54                                                                                        | NA                                                                                                                      | NA                                                                                                                      | NA                                                                                                                      | ↓ <sup>ab</sup> ICARS; R = -0.54                                                                                        | NA                                                                                                                      | NA                                                                                                                      |
| Schulz et al. 2010 <sup>29</sup> (SPM5 and Toolbox; 1.5T); cross-sectional       | SCA1     | 48  | GM         | ↓ <sup>a</sup> ICARS; R = -0.53<br>↓ <sup>a</sup> ICARS; R = -0.54                                                      | ↓ <sup>a</sup> ICARS; R = -0.53<br>↓ <sup>a</sup> ICARS; R = -0.54                                                      | ↓ <sup>a</sup> ICARS; R = -0.53<br>↓ <sup>a</sup> ICARS; R = -0.54                                                      | ↓ <sup>a</sup> ICARS; R = -0.54                                                                                         | ↓ <sup>a</sup> ICARS; R = -0.54                                                                                         | ↓ <sup>a</sup> ICARS; R = -0.54                                                                                         | ↓ <sup>a</sup> ICARS; R = -0.54                                                                                         | ↓ <sup>a</sup> ICARS; R = -0.54                                                                                         | ↓ <sup>a</sup> ICARS; R = -0.54                                                                                         | NA                                                                                                                      |
| D'Abreu et al. 2012 <sup>16</sup> (SPM2; 2T); cross-sectional                    | SCA3/MJD | 24  | GM         | ↓ <sup>a</sup> ICARS; R = 0.730                                                                                         |
| D'Abreu et al. 2012 <sup>16</sup> (SPM2; 2T); longitudinal data; follow-up: 1 yr | SCA3/MJD | 45  | GM         | ↓ <sup>a</sup> ICARS; R = 0.730                                                                                         |
| Guimarães et al. 2013 <sup>24</sup> (SPM8; 3T); cross-sectional                  | SCA3/MJD | 38  | GM         | ↓ <sup>a</sup> SARA; R = NA<br>↓ <sup>a</sup> DD; R = NA<br>↓ <sup>a</sup> SARA; R = NA<br>↓ <sup>a</sup> ICARS; R = NA | ↓ <sup>a</sup> SARA; R = NA<br>↓ <sup>a</sup> DD; R = NA<br>↓ <sup>a</sup> SARA; R = NA<br>↓ <sup>a</sup> ICARS; R = NA | ↓ <sup>a</sup> SARA; R = NA<br>↓ <sup>a</sup> DD; R = NA<br>↓ <sup>a</sup> SARA; R = NA<br>↓ <sup>a</sup> ICARS; R = NA | ↓ <sup>a</sup> SARA; R = NA<br>↓ <sup>a</sup> DD; R = NA<br>↓ <sup>a</sup> SARA; R = NA<br>↓ <sup>a</sup> ICARS; R = NA | ↓ <sup>a</sup> SARA; R = NA<br>↓ <sup>a</sup> DD; R = NA<br>↓ <sup>a</sup> SARA; R = NA<br>↓ <sup>a</sup> ICARS; R = NA | ↓ <sup>a</sup> SARA; R = NA<br>↓ <sup>a</sup> DD; R = NA<br>↓ <sup>a</sup> SARA; R = NA<br>↓ <sup>a</sup> ICARS; R = NA | ↓ <sup>a</sup> SARA; R = NA<br>↓ <sup>a</sup> DD; R = NA<br>↓ <sup>a</sup> SARA; R = NA<br>↓ <sup>a</sup> ICARS; R = NA | ↓ <sup>a</sup> SARA; R = NA<br>↓ <sup>a</sup> DD; R = NA<br>↓ <sup>a</sup> SARA; R = NA<br>↓ <sup>a</sup> ICARS; R = NA | ↓ <sup>a</sup> SARA; R = NA<br>↓ <sup>a</sup> DD; R = NA<br>↓ <sup>a</sup> SARA; R = NA<br>↓ <sup>a</sup> ICARS; R = NA | ↓ <sup>a</sup> SARA; R = NA<br>↓ <sup>a</sup> DD; R = NA<br>↓ <sup>a</sup> SARA; R = NA<br>↓ <sup>a</sup> ICARS; R = NA |
| Reetz et al. 2013 <sup>17</sup> (SPM8; 1.5T); longitudinal data; follow-up: 2 yr | SCA 1    | 37  | GM         | ↓ <sup>a</sup> CAG <sup>exp</sup> ; R = -0.480                                                                          | ↓ <sup>a</sup> CAG <sup>exp</sup> ; R = -0.480                                                                          | ↓ <sup>a</sup> CAG <sup>exp</sup> ; R = -0.480                                                                          | ↓ <sup>a</sup> CAG <sup>exp</sup> ; R = -0.480                                                                          | ↓ <sup>a</sup> CAG <sup>exp</sup> ; R = -0.480                                                                          | ↓ <sup>a</sup> CAG <sup>exp</sup> ; R = -0.480                                                                          | ↓ <sup>a</sup> CAG <sup>exp</sup> ; R = -0.480                                                                          | ↓ <sup>a</sup> CAG <sup>exp</sup> ; R = -0.480                                                                          | ↓ <sup>a</sup> CAG <sup>exp</sup> ; R = -0.480                                                                          | ↓ <sup>a</sup> CAG <sup>exp</sup> ; R = -0.480                                                                          |
| <b>Surface-based analysis</b>                                                    |          |     |            |                                                                                                                         |                                                                                                                         |                                                                                                                         |                                                                                                                         |                                                                                                                         |                                                                                                                         |                                                                                                                         |                                                                                                                         |                                                                                                                         |                                                                                                                         |
| de Reus et al. 2015 <sup>22</sup> (FreeSurfer; 3T); cross-sectional              | SCA3/MJD | 49  | GM         | ↓ <sup>a</sup> DD; R = 0.543                                                                                            |
| Hernandez-Castillo et al. 2015 <sup>28</sup> (FSL; 3T)                           | SCA7     | 24  | GM         | ↓ <sup>a</sup> SARA; R = -(0.640-0.817)                                                                                 |
| <b>Semiautomatized volumetric analysis</b>                                       |          |     |            |                                                                                                                         |                                                                                                                         |                                                                                                                         |                                                                                                                         |                                                                                                                         |                                                                                                                         |                                                                                                                         |                                                                                                                         |                                                                                                                         |                                                                                                                         |
| Schulz et al. 2010 <sup>29</sup> (1.5T); cross-sectional                         | SCA1     | 48  | GM         | ↓ <sup>a</sup> SARA; R = -0.459                                                                                         |
| Fahl et al. 2015 <sup>33</sup> (3T); cross-sectional                             | SCA3/MJD | 48  | GM         | ↓ <sup>a</sup> SARA; R = -0.560                                                                                         |
| Reetz et al. 2013 <sup>17</sup> (1.5T; SPM8); longitudinal data; follow-up: 2 yr | SCA 1    | 37  | GM         | ↓ <sup>a</sup> CAG <sup>exp</sup> ; R = -(0.370-0.380)                                                                  | ↓ <sup>a</sup> CAG <sup>exp</sup> ; R = -(0.370-0.380)                                                                  | ↓ <sup>a</sup> CAG <sup>exp</sup> ; R = -(0.370-0.380)                                                                  | ↓ <sup>a</sup> CAG <sup>exp</sup> ; R = -(0.370-0.380)                                                                  | ↓ <sup>a</sup> CAG <sup>exp</sup> ; R = -(0.370-0.380)                                                                  | ↓ <sup>a</sup> CAG <sup>exp</sup> ; R = -(0.370-0.380)                                                                  | ↓ <sup>a</sup> CAG <sup>exp</sup> ; R = -(0.370-0.380)                                                                  | ↓ <sup>a</sup> CAG <sup>exp</sup> ; R = -(0.370-0.380)                                                                  | ↓ <sup>a</sup> CAG <sup>exp</sup> ; R = -(0.370-0.380)                                                                  | ↓ <sup>a</sup> CAG <sup>exp</sup> ; R = -(0.370-0.380)                                                                  |
| <b>MR spectroscopy</b>                                                           |          |     |            |                                                                                                                         |                                                                                                                         |                                                                                                                         |                                                                                                                         |                                                                                                                         |                                                                                                                         |                                                                                                                         |                                                                                                                         |                                                                                                                         |                                                                                                                         |
| Lei et al. 2011 <sup>29</sup> (1.5T); cross-sectional                            | SCA3/MJD | 36  | NAA/Cr     | ↓ <sup>a</sup> DD; R = 0.421; SARA; R = 0.452                                                                           | ↓ <sup>a</sup> DD; R = 0.421; SARA; R = 0.452                                                                           | ↓ <sup>a</sup> DD; R = 0.421; SARA; R = 0.452                                                                           | ↓ <sup>a</sup> DD; R = 0.421; SARA; R = 0.452                                                                           | ↓ <sup>a</sup> DD; R = 0.421; SARA; R = 0.452                                                                           | ↓ <sup>a</sup> DD; R = 0.421; SARA; R = 0.452                                                                           | ↓ <sup>a</sup> DD; R = 0.421; SARA; R = 0.452                                                                           | ↓ <sup>a</sup> DD; R = 0.421; SARA; R = 0.452                                                                           | ↓ <sup>a</sup> DD; R = 0.421; SARA; R = 0.452                                                                           | ↓ <sup>a</sup> DD; R = 0.421; SARA; R = 0.452                                                                           |
| Wang et al. 2012 <sup>22</sup> (1.5T); cross-sectional                           | SCA3/MJD | 48  | Cho/Cr     | ↓ <sup>a</sup> SARA; R = -(0.536-553)                                                                                   |

Continued on next page

**On-line Table 1: Continued**

| Study                                                        | SCA      | No. | Cerebellum |                                |                                |         |          |              |       | Brain Stem |      |                                                |                |    |
|--------------------------------------------------------------|----------|-----|------------|--------------------------------|--------------------------------|---------|----------|--------------|-------|------------|------|------------------------------------------------|----------------|----|
|                                                              |          |     | Total      | Hemispheres                    | Vermis                         | Dentate | Peduncle | Other Nuclei | Total | Midbrain   | Pons | Medulla Oblongata                              | Cervical Spine |    |
| Lirng et al. 2012 <sup>21</sup><br>(1.5T); cross-sectional   | SCA3/MID | 58  | NA         | ↓ <sup>a</sup> SARA:<br>R = NA | ↓ <sup>a</sup> SARA:<br>R = NA | NA      | NA       | NA           | NA    | NA         | NA   | NA                                             | NA             | NA |
| Lopes et al. 2013 <sup>26</sup><br>(3T); cross-sectional     | SCA3/MID | 32  | NA         | ↓ <sup>a</sup> SARA:<br>R = NA | ↓ <sup>a</sup> SARA:<br>R = NA | NA      | NA       | NA           | NA    | NA         | NA   | NA                                             | NA             | NA |
| Adanyeguh et al. 2015 <sup>19</sup><br>(3T); cross-sectional | SCA3/MID | 21  | NA         | ↓                              | ↑                              | NA      | NA       | NA           | NA    | NA         | NA   | NA                                             | NA             | NA |
|                                                              |          |     | mins       | NA                             | ↑                              | NA      | NA       | NA           | NA    | NA         | ↑    | ↑ <sup>a</sup> SARA:<br>R <sup>2</sup> = 0.414 | NA             | NA |
|                                                              |          |     | Cr         | NA                             | ↑                              | NA      | NA       | NA           | NA    | NA         | ↑    | ↑ <sup>a</sup> SARA:<br>R <sup>2</sup> = 0.414 | NA             | NA |
|                                                              |          |     | NAAG       | NA                             | ↑                              | NA      | NA       | NA           | NA    | NA         | ↑    | ↑ <sup>a</sup> SARA:<br>R <sup>2</sup> = 0.414 | NA             | NA |
|                                                              |          |     | GABA       | NA                             | ↑                              | NA      | NA       | NA           | NA    | NA         | ↑    | ↑ <sup>a</sup> SARA:<br>R <sup>2</sup> = 0.414 | NA             | NA |
|                                                              |          |     | GPC        | NA                             | ↑                              | NA      | NA       | NA           | NA    | NA         | ↑    | ↑ <sup>a</sup> SARA:<br>R <sup>2</sup> = 0.414 | NA             | NA |
|                                                              |          |     | ChoP       | NA                             | ↑                              | NA      | NA       | NA           | NA    | NA         | ↑    | ↑ <sup>a</sup> SARA:<br>R <sup>2</sup> = 0.414 | NA             | NA |
|                                                              |          |     | Other      | NA                             | ↑                              | NA      | NA       | NA           | NA    | NA         | ↑    | ↑ <sup>a</sup> SARA:<br>R <sup>2</sup> = 0.414 | NA             | NA |
| <b>DTI</b>                                                   |          |     |            |                                |                                |         |          |              |       |            |      |                                                |                |    |
| Guimarães et al. 2013 <sup>24</sup><br>(3T); cross-sectional | SCA3/MID | 38  | ↓          | ↓                              | ↑                              | ↓       | ↓        | ↓            | ↓     | ↓          | ↓    | ↓                                              | ↓              | ↓  |
|                                                              |          |     | FA         | ↓                              | ↑                              | ↓       | ↓        | ↓            | ↓     | ↓          | ↓    | ↓                                              | ↓              | ↓  |
|                                                              |          |     | AD         | ↑                              | ↑                              | ↑       | ↑        | ↑            | ↑     | ↑          | ↑    | ↑                                              | ↑              | ↑  |
|                                                              |          |     | RD         | ↑                              | ↑                              | ↑       | ↑        | ↑            | ↑     | ↑          | ↑    | ↑                                              | ↑              | ↑  |
|                                                              |          |     | MID        | ↑                              | ↑                              | ↑       | ↑        | ↑            | ↑     | ↑          | ↑    | ↑                                              | ↑              | ↑  |

**Note:**—NAAG indicates N-acetylaspartylglutamate; PCr, phosphocreatine; AO, age at onset; CAGexp, length of the expanded CAG repeat; DD, disease duration; NA, not available; ↓, ↓, this SCA presents more marked atrophy than another SCA subtype in the same study; ↓, decrease; ↑, increase; =, no difference in the parameter or region atrophy comparing with controls (cross-sectional) or with time (longitudinal); GPC, glycerophosphorylcholine; ChoP, phosphorylcholine; MD, mean diffusivity.

<sup>a</sup> Significant correlation of region-specific volume atrophy with clinical scales, disease duration, CAGexp, or age at onset.

<sup>b</sup> Significant correlation of grouped GM and WM alterations with clinical scales, disease duration, CAGexp; individual region-specific correlations not provided.

<sup>c</sup> Significant correlation with neuropsychological tests.

<sup>d</sup> The study of Reetz et al<sup>17</sup> used  $P < .001$  as threshold for significant difference.

<sup>e</sup> Differences between right and left sides.

**On-line Table 2. Main supratentorial findings**

| Study                                                                                                  | SCA      | No. | Caudate                         | Putamen | GPI | Lentiform | Clastrum | Thalamus                         | Hemispheres | Temporal Lobe                                                       | Frontal Lobe                            | Parietal Lobe                                                 | Occipital Lobe                  | Limbic Lobe                               | Corpus Callosum |
|--------------------------------------------------------------------------------------------------------|----------|-----|---------------------------------|---------|-----|-----------|----------|----------------------------------|-------------|---------------------------------------------------------------------|-----------------------------------------|---------------------------------------------------------------|---------------------------------|-------------------------------------------|-----------------|
| <b>VBM</b>                                                                                             |          |     |                                 |         |     |           |          |                                  |             |                                                                     |                                         |                                                               |                                 |                                           |                 |
| Della Nave et al, 2008 <sup>18</sup><br>(SPM2; 15T); cross-sectional                                   | SCA2     | 20  | GM                              | =       | =   | =         | =        | =                                | =           | =                                                                   | =                                       | =                                                             | =                               | =                                         | NA              |
| Schulz et al, 2010 <sup>29</sup> (SPM5 and Toolbox; 15T); cross-sectional                              | SCA1     | 48  | GM                              | =       | =   | =         | =        | =                                | =           | =                                                                   | =                                       | =                                                             | =                               | =                                         | =               |
| D'Abreu et al, 2011 <sup>31</sup> (SPM2); cross-sectional                                              | SCA3/MID | 24  | GM                              | =       | =   | =         | =        | =                                | =           | =                                                                   | =                                       | =                                                             | =                               | =                                         | NA              |
| D'Abreu et al, 2012 <sup>16</sup> (SPM2; 2T); cross-sectional                                          | SCA3/MID | 45  | GM                              | NA      | NA  | NA        | NA       | ↓ <sup>c</sup>                   | NA          | ↓ <sup>a</sup> ICARS: R = 0.717                                     | ↓ <sup>a,b</sup> SARA: R = -(0.303-354) | ↓ <sup>a</sup> ICARS: R = 0.569                               | ↓ <sup>a</sup> ICARS: R = 0.443 | ↓ <sup>a</sup> age and CAG <sub>exp</sub> | NA              |
| D'Abreu et al, 2012 <sup>16</sup> (SPM2; 2T); longitudinal; follow-up: 1 yr                            | SCA3/MID | 45  | GM                              | NA      | NA  | NA        | NA       | NA                               | =           | =                                                                   | =                                       | =                                                             | =                               | =                                         | NA              |
| Reetz K. et al, 2013 <sup>17</sup> (SPM8; 15T); longitudinal; follow-up: 2 yr                          | SCA 1    | 37  | WM                              | NA      | NA  | NA        | NA       | NA                               | =           | =                                                                   | =                                       | =                                                             | =                               | =                                         | NA              |
| <b>Surface-based analysis</b><br>de Rezende et al, 2015 <sup>32</sup> (FreeSurfer 3T); cross-sectional | SCA3/MID | 49  | GM                              | ↓       | ↓   | NA        | NA       | ↓ <sup>a,c</sup> SARA: R = 0.777 | NA          | ↓ <sup>a</sup> AO: R = 0.239; DD: R = 0.223; SARA: R = -(0.302-311) | ↓ <sup>a,b</sup> SARA: R = -(0.303-354) | ↓ <sup>a</sup> AO: R = 0.386; DD: R = 0.376; SARA: R = -0.311 | ↓                               | ↓                                         | NA              |
| Hernandez-Castillo et al, 2015 <sup>28</sup> (FSI; 3T)                                                 | SCA7     | 24  | GM                              | =       | =   | =         | =        | =                                | =           | ↓ <sup>a</sup> SARA: R = -(0.725-799)                               | ↓                                       | ↓                                                             | =                               | =                                         | NA              |
| <b>Semiautomatized volumetric analysis</b>                                                             |          |     |                                 |         |     |           |          |                                  |             |                                                                     |                                         |                                                               |                                 |                                           |                 |
| Schulz et al, 2010 <sup>29</sup> (15T); cross-sectional                                                | SCA1     | 48  | ↓                               | ↓       | NA  | NA        | NA       | NA                               | =           | ↓                                                                   | =                                       | =                                                             | =                               | =                                         | NA              |
| D'Abreu et al, 2011 <sup>31</sup> ; cross-sectional                                                    | SCA3/MID | 24  | ↓ <sup>a</sup> SARA: R = -0.455 | ↓       | NA  | NA        | NA       | NA                               | =           | ↓                                                                   | =                                       | =                                                             | =                               | =                                         | NA              |
| Reetz et al, 2013 <sup>17</sup> (15T); longitudinal; follow-up: 2 yr                                   | SCA3/MID | 45  | NA                              | NA      | NA  | NA        | NA       | ↓                                | NA          | NA                                                                  | NA                                      | NA                                                            | NA                              | NA                                        | NA              |
| <b>MR spectroscopy</b>                                                                                 |          |     |                                 |         |     |           |          |                                  |             |                                                                     |                                         |                                                               |                                 |                                           |                 |
| D'Abreu et al, 2009 <sup>25</sup> (2T); cross-sectional                                                | SCA 1    | 37  | ↓                               | ↓       | NA  | NA        | NA       | NA                               | =           | =                                                                   | =                                       | =                                                             | =                               | =                                         | NA              |
| D'Abreu et al, 2012 <sup>16</sup> (2T); longitudinal; follow-up: 1 yr                                  | SCA3/MID | 40  | NA/Gr                           | NA      | NA  | NA        | NA       | NA                               | NA          | NA                                                                  | NA                                      | NA                                                            | NA                              | NA                                        | ↓               |
| <b>DTI</b>                                                                                             |          |     |                                 |         |     |           |          |                                  |             |                                                                     |                                         |                                                               |                                 |                                           |                 |
| Guimaraes et al, 2013 <sup>24</sup> (8T); cross-sectional                                              | SCA3/MID | 38  | FA                              | =       | =   | =         | =        | =                                | NA          | =                                                                   | =                                       | =                                                             | =                               | =                                         | =               |
|                                                                                                        |          |     | AD                              | =       | =   | =         | =        | ↑                                | NA          | =                                                                   | =                                       | =                                                             | =                               | =                                         | =               |
|                                                                                                        |          |     | RD                              | =       | =   | =         | =        | ↑                                | NA          | ↑                                                                   | ↑                                       | ↑                                                             | =                               | =                                         | ↑               |
|                                                                                                        |          |     | MD                              | =       | =   | =         | =        | =                                | NA          | =                                                                   | =                                       | =                                                             | =                               | =                                         | =               |

**Note:** — ↓ indicates decrease; ↑, increase; =, no difference in the parameter or region atrophy compared with controls (cross-sectional) or with time (longitudinal); NA, not available; No., number of individuals per group; GPI, internal globus pallidus; AO, age at onset; CAG<sub>exp</sub>, length of the expanded CAG repeat; DD, disease duration; MD, mean diffusivity.  
<sup>a</sup> Significant correlation of region-specific volume atrophy with clinical scales, disease duration, CAG<sub>exp</sub> or age at onset.  
<sup>b</sup> Differences between right and left sides.  
<sup>c</sup> Inclusion of the same cohort of patients, repeat data.

**On-line Table 3: Volumetric and surface analysis extraction table<sup>a</sup>**

| Author, Year/Country Design/Medical Scenario Population                                                                                                                                                                                                                                | Sample Size                                                                                                                                                                                                                                                                                                                                                                                         | Outcomes                                                                                          | Acquisition, Postprocessing                                                                                                                                                                                                                                                                                                                                                                                  | Main Findings                                                                                                                                                                                                                                                                                                                                                                                                                                                                                                                                                                                                                                                                                                                                                                                                                                                                                                                                                                                                                                                                                                                                                                                                                                                                                                                                                                                                                                                                                                                                                                                                                                                                                                                                                                                                        | Correlations                                                                                                                                                                                                                                                                                                                                                                                                                                                                                                                                                                                                                                                                                                                                                                                                                                                                                                                                                                                                                                       | Limitations                                                                                                                                                                                                                                                                       |
|----------------------------------------------------------------------------------------------------------------------------------------------------------------------------------------------------------------------------------------------------------------------------------------|-----------------------------------------------------------------------------------------------------------------------------------------------------------------------------------------------------------------------------------------------------------------------------------------------------------------------------------------------------------------------------------------------------|---------------------------------------------------------------------------------------------------|--------------------------------------------------------------------------------------------------------------------------------------------------------------------------------------------------------------------------------------------------------------------------------------------------------------------------------------------------------------------------------------------------------------|----------------------------------------------------------------------------------------------------------------------------------------------------------------------------------------------------------------------------------------------------------------------------------------------------------------------------------------------------------------------------------------------------------------------------------------------------------------------------------------------------------------------------------------------------------------------------------------------------------------------------------------------------------------------------------------------------------------------------------------------------------------------------------------------------------------------------------------------------------------------------------------------------------------------------------------------------------------------------------------------------------------------------------------------------------------------------------------------------------------------------------------------------------------------------------------------------------------------------------------------------------------------------------------------------------------------------------------------------------------------------------------------------------------------------------------------------------------------------------------------------------------------------------------------------------------------------------------------------------------------------------------------------------------------------------------------------------------------------------------------------------------------------------------------------------------------|----------------------------------------------------------------------------------------------------------------------------------------------------------------------------------------------------------------------------------------------------------------------------------------------------------------------------------------------------------------------------------------------------------------------------------------------------------------------------------------------------------------------------------------------------------------------------------------------------------------------------------------------------------------------------------------------------------------------------------------------------------------------------------------------------------------------------------------------------------------------------------------------------------------------------------------------------------------------------------------------------------------------------------------------------|-----------------------------------------------------------------------------------------------------------------------------------------------------------------------------------------------------------------------------------------------------------------------------------|
| Della Nave et al. 2008 <sup>18</sup> /Italy Case-control/single center Consecutive patients with SCA2 and healthy age- and sex-matched controls                                                                                                                                        | 20 Individuals with SCA2<br>10 Women<br>Age: 49 ± 12 yr<br>CAG <sub>exp</sub> : 39 ± 3<br>Disease duration: 6.97 ± 3.19 yr<br>ICARS: 32 ± 16<br>IACRS: 14 ± 16                                                                                                                                                                                                                                      | Differences in GM and WM volumes between patients and controls                                    | 1.5T system<br>VBM-SPM2-Schmahmann <sup>42</sup> ; MRI atlas of the human cerebellum, anatomic reference<br>GM, WM, or CSF in the ROI calculated as average values, taking into account that in the voxels contained in the ROI, the possible value of GM, WM, or CSF is between 0 (null) and 1 (100%)                                                                                                       | GM loss ( $P < .005$ ) was symmetric in cerebellar vermis and in cerebellar hemispheres with sparing of vermis lobules I, II (lingula) and X (nodulus) and of hemispheric lobules I, II (lingula) and crus II<br>WM loss ( $P < .05$ ) was observed symmetrically in the peridentate regions, middle cerebellar peduncles, dorsal portion of the pons and in the superficial portion of the cerebellar peduncles<br>No GM or WM volume loss was observed in cerebellar hemispheres<br>Increase in CSF spaces in posterior fossa of patients with SCA2; more marked on preponine, ambiens and magna cisterns and in the lateral CSF spaces ( $P < .001$ for all comparisons)                                                                                                                                                                                                                                                                                                                                                                                                                                                                                                                                                                                                                                                                                                                                                                                                                                                                                                                                                                                                                                                                                                                                          | Clinical scales<br>ICARS<br>Cerebellar GM ( $R = -0.53$ )<br>WM volume in the peridentate regions, middle cerebellar peduncles, dorsal pons, and cerebellar peduncles ( $R = -0.54$ )<br>CSF volume in the posterior cranial fossa ( $R = 0.45$ )<br>IACRS<br>Cerebellar GM ( $R = -0.54$ )<br>WM volume in the peridentate regions, middle cerebellar peduncles, dorsal pons, and cerebellar peduncles ( $R = -0.49$ )<br>Disease durations and GM and WM correlations were referred to as borderline ( $P$ value not given)<br>No significant correlations with CAG <sub>exp</sub> were observed                                                                                                                                                                                                                                                                                                                                                                                                                                                 | Date of data collection not reported<br>$P$ values of simple correlation tests were not provided<br>Both GM and WM alterations were grouped to perform correlation analysis; therefore, specific region atrophy correlations with clinical and molecular finding was not provided |
| Schulz et al. 2010 <sup>49</sup> /Germany, Belgium, Italy, the Netherlands, France, Spain, and Poland Case-control/multicenter: 9 EUROSCA Consecutive patients with SCA1, SCA3/MID, and SCA6; healthy age- and sex-matched controls Collection data: between July 2005 and August 2006 | 48 Individuals with SCA1<br>Age: 44.3 ± 11.9 yr<br>17 Women<br>Disease duration: 8.1 ± 4.5 yr<br>SARA: 12.0 ± 5.2<br>UHDRS-IV: 21.2 ± 4.7<br>24 Individuals with SCA3/MID<br>Age: 47.3 ± 11.4 yr<br>13 Women<br>Disease duration: 11.7 ± 6.0 yr<br>SARA: 12.0 ± 5.7<br>UHDRS-1, V: 20.3 ± 4.5<br>37 Controls<br>Age: 49.8 ± 16.2 yr<br>18 Women<br>SCA6 data were excluded due to sample size of 10 | Differences of volumetric analysis between SCA subtypes and controls and between each SCA subtype | 1.5T system<br>VBM-SPM5 and VBM Toolbox<br>Segmentation of gray matter, white matter, and CSF: iterative segmentation approach<br>Volumetric analysis, manual presegmentation, Talairach grid<br>MRI datasets analyzed by 1 blinded investigator<br>Volumetry, presegmentation and automated<br>Region segmentation: calculation of the volumes; multiplying the number of voxels per ROI and the voxel size | VBM<br>SCA1 versus controls:<br>Loss of gray matter volume ( $P < .001$ ) in the caudate nucleus, and temporal lobes; white matter loss in brain stem, pons, middle cerebellar peduncles, cerebellar hemispheres, and midbrain; all hemispheric and vermal cerebellum lobules were involved<br>SCA3/MID versus controls:<br>Loss of gray matter volume in cerebellar hemispheres, vermis, but almost none in the pons, basal ganglia, and cerebellum stem, pons, midbrain, cerebellar peduncles, and cerebellar hemispheres; atrophy affected the hemispheric lobules I-VI; atrophy in the vermis spared the lobules VII and VIII<br>Total intracranial volumes were not different between groups<br>Semiautomated volumetric analysis<br>SCA1 X controls: Atrophy ( $P < .05$ ) on brain stem, pons, medulla, cerebellum, cerebellar hemispheres, and vermis, caudate, putamen, temporal lobes<br>SCA3/MID X controls:<br>Atrophy ( $P < .05$ ) on brain stem, midbrain, pons, medulla, cerebellum, cerebellar hemispheres, and vermis, caudate, putamen, temporal lobes<br>SCA1 X SCA3/MID: Cerebellum, cerebellar hemispheres, and putamen with more marked atrophy in SCA1 ( $P < .05$ ); midbrain and parietal lobes with more marked atrophy in SCA3/MID ( $P < .05$ )<br>Region-specific atrophy: Cohen effect size had similar results in SCA1 and SCA3/MID; most pronounced atrophy was in total brain stem, pons, and medulla; less volume loss in cerebellar structures, and least volume loss in the putamen and caudate nucleus<br>Significant thalamus atrophy in patients on automated analysis ( $P = .01$ )<br>Smaller thalamic volume in patients with SCA3/MID ( $7862.5 \pm 712.5 \text{ mm}^3$ ) compared with controls ( $8592.3 \pm 712.5 \text{ mm}^3$ ; $P < .001$ ) on manual segmentation | Clinical scales<br>SARA<br>Brain stem ( $R = -0.447$ , $P < .001$ )<br>Pons ( $R = -0.531$ , $P < .001$ )<br>UHDRS<br>Brain stem ( $R = -0.376$ , $P < .01$ )<br>Pons ( $R = -0.438$ , $P < .001$ )<br>Disease duration:<br>Pons ( $R = -0.311$ , $P < .05$ )<br>The length of CAG <sub>exp</sub> did not correlate with any region degree of atrophy<br>In SCA1, the pons volume explained 28% of the variance of SARA on regression analysis [ $F(7,46) = 18.0$ , $P = .001$ ]<br>SCA3/MID<br>Clinical scales<br>SARA<br>Brain stem ( $R = -0.677$ , $P < .001$ )<br>Midbrain ( $R = -0.467$ , $P < .05$ )<br>Pons ( $R = -0.560$ , $P < .01$ )<br>Medulla ( $R = -0.479$ , $P < .01$ ); total cerebellum ( $R = -0.451$ , $P < .05$ )<br>Caudate nucleus ( $-0.455$ , $P < .05$ )<br>CAG <sub>exp</sub> and disease duration did not correlate with regional atrophy<br>In SCA3/MID, the stepwise inclusion of pons and medulla together explained 53% of the variance in SARA in the linear regression model [ $F(2,21) = 11.7$ , $P < .001$ ] | CAG <sub>exp</sub> repeats per group not provided; no other major limitation                                                                                                                                                                                                      |
| D'Abreu et al. 2011 <sup>31</sup> /Brazil Case-control/single center SCA3/MID and healthy controls                                                                                                                                                                                     | 45 Individuals with SCA3/MID<br>Age: 46.2 ± 13.2 yr<br>Disease duration: 9.9 ± 6.1 yr<br>CAG <sub>exp</sub> : 66<br>52 Controls<br>Age- and sex-matched                                                                                                                                                                                                                                             | MRI findings of thalamus correlations with clinical and genetic markers of the disease            | Tesla system not informed<br>Automated thalamic volume preprocessed: Marsbar volume toolbox <sup>43</sup> to SPM2 and selected thalamic ROIs; manual segmentation of the thalamus display software                                                                                                                                                                                                           | No significant correlation of thalamus atrophy with CAG repeat length, disease duration, and age of onset or age<br>On manual measurement, patients with dystonia had smaller thalamic volumes than patients without dystonia ( $P = .049$ )                                                                                                                                                                                                                                                                                                                                                                                                                                                                                                                                                                                                                                                                                                                                                                                                                                                                                                                                                                                                                                                                                                                                                                                                                                                                                                                                                                                                                                                                                                                                                                         | Origin of patients and controls and period of data collection not reported<br>No information about manual analysis blinding was provided; authors confirmed that they used Tesla system $\geq 1.5T$                                                                                                                                                                                                                                                                                                                                                                                                                                                                                                                                                                                                                                                                                                                                                                                                                                                |                                                                                                                                                                                                                                                                                   |

Continued on next page

**On-line Table 3: Continued**

| Author, Year/Country Design/Medical Scenario Population                                                                                                                                              | Sample Size                                                                                                                                                                                                                                                                                                           | Outcomes                                                                                                                               | Acquisition, Postprocessing                                                                                                                                        | Main Findings                                                                                                                                                                                                                                                                                                                                                                                                                                                                                                                                                                                                                                                                                                                                                            | Correlations                                                                                                                                                                                                                                                                                                                                                                                                                                                                                                                                                                                                                                                                                                                                                                                                                                                                                                                                                                                                         | Limitations                                                                                                                                                                                                     |
|------------------------------------------------------------------------------------------------------------------------------------------------------------------------------------------------------|-----------------------------------------------------------------------------------------------------------------------------------------------------------------------------------------------------------------------------------------------------------------------------------------------------------------------|----------------------------------------------------------------------------------------------------------------------------------------|--------------------------------------------------------------------------------------------------------------------------------------------------------------------|--------------------------------------------------------------------------------------------------------------------------------------------------------------------------------------------------------------------------------------------------------------------------------------------------------------------------------------------------------------------------------------------------------------------------------------------------------------------------------------------------------------------------------------------------------------------------------------------------------------------------------------------------------------------------------------------------------------------------------------------------------------------------|----------------------------------------------------------------------------------------------------------------------------------------------------------------------------------------------------------------------------------------------------------------------------------------------------------------------------------------------------------------------------------------------------------------------------------------------------------------------------------------------------------------------------------------------------------------------------------------------------------------------------------------------------------------------------------------------------------------------------------------------------------------------------------------------------------------------------------------------------------------------------------------------------------------------------------------------------------------------------------------------------------------------|-----------------------------------------------------------------------------------------------------------------------------------------------------------------------------------------------------------------|
| D'Abreu et al. 2012 <sup>36</sup> /Brazil Case-control/single center Consecutive patients with SCA3/MID and healthy controls                                                                         | 45 Individuals with SCA3/MID<br>Age: 47.02 ± 12.23 yr<br>15 Women<br>Age of onset: 37.04 ± 11.05 yr<br>Disease duration: 9.97 ± 6.13 yr<br>CAG <sub>exp</sub> : 72 (range: 65–81)<br>ICARS: 36.36 ± 18.5<br><br>51 Controls<br>Age: 44.08 ± 11.78 yr                                                                  | Differences in GM and WM density between patients and controls                                                                         | 2T system<br>VBM: MairBar software <sup>b</sup> on SPM2 to extract the GMD in selected ROIs                                                                        | Significant decreases in GMD ( $P < .01$ ) in the cerebellum and vermis, brain stem (medulla, pons, and midbrain), lentiform nucleus, caudate nucleus, claustrum, frontal lobes (precentral, inferior, superior, and middle frontal gyri; paracentral lobule); parietal lobes (postcentral gyrus; precuneus; inferior, superior, angular, and supramarginal gyri); temporal lobes (fusiform gyrus; insula; middle, superior temporal gyrus); occipital gyrus (cuneus, inferior occipital gyrus, lingual gyrus, middle occipital gyrus, superior occipital gyrus); limbic lobe (cingulate cortex; parahippocampal gyrus); and thalamus<br>WM abnormalities were observed only in the deep cerebellar WM<br>No changes in GMD and WMD between MRIs after 1 yr of follow-up | CAG number, disease duration, and age were significant factors in the determination of the GMD in areas 3, 4, 5, and 6 of the cerebellum; left anterior cingulate gyrus; inferior (bilateral), middle (left), and superior (left) frontal lobes; fusiform gyrus (bilateral); Heschl gyrus (bilateral); insula (bilateral); lingual gyrus (bilateral); paracentral lobule (bilateral); postcentral gyrus (left); precuneus (bilateral); precuneus (left); Rolandic area (bilateral); supplementary motor area (left); inferior (left), middle (left), and superior temporal gyri (bilateral); all verman areas<br>Age and CAG length were the most frequent factors in the determination of ROI densities, while disease duration was only an independent factor in the middle frontal gyrus orbicular part; age was the most frequent independent determinant of ROI density<br>ROIs that were important determinants of the final ICARS score: cerebellum, vermis, frontal, parietal, temporal, and occipital lobes | Origin of patients and controls (and sex proportion of controls) and period of data collection not reported<br>95% CIs were not reported                                                                        |
| Guimarães et al. 2013 <sup>24</sup> /Brazil Case-control/single center, specialized neurology department Patients with SCA3/MID and healthy age- and sex-matched controls Collection data: 2009–2011 | 38 Individuals with SCA3/MID<br>Age: 40.38 ± 12.12 yr<br>17 Women<br>CAG <sub>exp</sub> : 68.08 ± 4.5<br>ICARS: 32.08 ± 14.01<br>SARA: 14.65 ± 7.33<br><br>38 Healthy controls<br>Age: 46.86 ± 12.07 yr<br>18 Women                                                                                                   | Differences in infratentorial regions between groups and the correlation with other disease markers                                    | 3T system<br>Volumetric (3D) T1 gradient-echo images acquired in the sagittal plane with 1-mm section thickness<br>VBM: SUIT toolbox with SPM8/DARTEL <sup>d</sup> | WM infratentorial structure atrophy ( $P < .05$ ): cerebellar areas: tonsil, posterior lobe, culmen, declive, vermis, dentate, uvula, posterior cingulate, fastigium, tuber, nodule, and cerebellar peduncles; brain stem: right brain stem, medulla, pyramids, and pons GM infratentorial structure atrophy ( $P < .05$ ): cerebellar areas: posterior lobe, vermis, tonsil, inferior semilunar lobule, declive, uvula, fastigium, and tuber; brain stem: pons, pyramids, and medulla                                                                                                                                                                                                                                                                                   | Disease duration:<br>Negative correlation ( $P < .05$ ) with brain stem: pons, midbrain, pyramids, cerebellum; anterior and posterior lobes; cerebellar tonsil, culmen, dentate, uvula, fastigium, vermis, tuber, and declive<br>Clinical scales (SARA and ICARS):<br>Negative correlation ( $P < .05$ ) with brain stem: left and right brain stem, midbrain, cerebellum, posterior and anterior lobe, culmen, and vermis GM<br>Clinical scales (SARA): Negative correlation ( $P < .05$ ) with brain stem: midbrain, pons, cerebellum; anterior and posterior cerebellar lobe                                                                                                                                                                                                                                                                                                                                                                                                                                      | 95% CIs were not reported<br>The magnitude of the correlations of regional atrophy with other markers was not provided, only the significance                                                                   |
| Lopes et al. 2013 <sup>26</sup> /Brazil Case-control/single center Exploratory study Patients with SCA3/MID and healthy controls matched for age, sex, and educational level                         | 32 Individuals with SCA3/MID<br>Age: 46.97 ± 12.06 yr<br>17 Women<br>Mean educational level, 10.40 ± 4.27 yr<br>Age at onset: 36.72 ± 10.91 yr (range, 15–58 yr)<br>Disease duration, 10.09 ± 5.78 yr.<br>CAG <sub>exp</sub> : 69.0 ± 5.0<br>SARA: 13.6 ± 6.3<br><br>32 Controls<br>Age: 46.78 ± 11.47 yr<br>17 Women | Correlation between the cognitive findings and GM volume, WM integrity, cerebellar metabolite concentration, clinical and genetic data | 3T system<br>VBM: VBM Toolbox SPM8                                                                                                                                 | Differences between groups in the GM volume at right and left cerebellum, right putamen, left posterior cingulum, left superior parietal lobe [Brodmann area = 7] and left precentral gyrus [Brodmann area = 7]                                                                                                                                                                                                                                                                                                                                                                                                                                                                                                                                                          | VBM and cognitive test not reported; this was not an outcome of interest for this review                                                                                                                                                                                                                                                                                                                                                                                                                                                                                                                                                                                                                                                                                                                                                                                                                                                                                                                             | Origin of patients and controls and period of data collection not reported<br>95% CIs were not reported<br>Some analyses were not corrected for multiple comparisons due to the exploratory nature of the study |

Continued on next page

**On-line Table 3: Continued**

| Author, Year/Country Design/Medical Scenario Population                                                                                                                                                                                                                                                                                                        | Sample Size                                                                                                                                                                                                                                                                                                                                                                                                                                                                                                                                                                                                                                                                                                                                                                                                                                                                                                     | Outcomes                                                                                                                                                                          | Acquisition, Postprocessing                                                                                                                                                                                                                                                                                                                                                                                                                                                                                                                                                  | Main Findings                                                                                                                                                                                                                                                                                                                                                                                                                                                                                                                                                                                                                                                                                                                                                                                                                                                                                                                                                                                                                                                                                                                                                                                                                                                                                                                                                                                                                                                                                     | Correlations                                                                                                                                                                                                                                                                                                                                                                                                                                                                                                                                                                                            | Limitations                                                                                                                                                 |
|----------------------------------------------------------------------------------------------------------------------------------------------------------------------------------------------------------------------------------------------------------------------------------------------------------------------------------------------------------------|-----------------------------------------------------------------------------------------------------------------------------------------------------------------------------------------------------------------------------------------------------------------------------------------------------------------------------------------------------------------------------------------------------------------------------------------------------------------------------------------------------------------------------------------------------------------------------------------------------------------------------------------------------------------------------------------------------------------------------------------------------------------------------------------------------------------------------------------------------------------------------------------------------------------|-----------------------------------------------------------------------------------------------------------------------------------------------------------------------------------|------------------------------------------------------------------------------------------------------------------------------------------------------------------------------------------------------------------------------------------------------------------------------------------------------------------------------------------------------------------------------------------------------------------------------------------------------------------------------------------------------------------------------------------------------------------------------|---------------------------------------------------------------------------------------------------------------------------------------------------------------------------------------------------------------------------------------------------------------------------------------------------------------------------------------------------------------------------------------------------------------------------------------------------------------------------------------------------------------------------------------------------------------------------------------------------------------------------------------------------------------------------------------------------------------------------------------------------------------------------------------------------------------------------------------------------------------------------------------------------------------------------------------------------------------------------------------------------------------------------------------------------------------------------------------------------------------------------------------------------------------------------------------------------------------------------------------------------------------------------------------------------------------------------------------------------------------------------------------------------------------------------------------------------------------------------------------------------|---------------------------------------------------------------------------------------------------------------------------------------------------------------------------------------------------------------------------------------------------------------------------------------------------------------------------------------------------------------------------------------------------------------------------------------------------------------------------------------------------------------------------------------------------------------------------------------------------------|-------------------------------------------------------------------------------------------------------------------------------------------------------------|
| Retz et al, 2013 <sup>17</sup> /Germany, Belgium, Italy, the Netherlands, France, and Poland<br>Case-control/multicenter (EURO-SCA centers), specialized neurology departments<br>Patients with SCA1, SCA3/MID, and SCA6; healthy age- and sex-matched controls<br>Baseline collection data: November 2005–March 2007<br>Follow-up: January 2007–December 2008 | 63 (SCA1, n = 37; SCA3/MID, n = 19; SCA6, n = 7) of the 82 patients who were studied at baseline (Schulz et al, 2010 <sup>14</sup> ) were available for follow-up; 19 (23%) dropped out<br><br>37 Individuals with SCA1 (48 at baseline)<br>Age: 43.32 ± 11.14 yr<br>16 Women<br>CA <sub>Gexp</sub> : 48.9 ± 6.06<br>Disease duration: 6.97 ± 3.19 yr<br>SARA: 11.63 ± 4.56<br>INAS: 5.43 ± 2.12<br>SCAFI: -0.18 ± 0.71<br>UHDRS-IV: 21.33 ± 4.58<br><br>37 SCA1 controls<br>Age: 43.43 ± 11.7 yr<br>16 Women<br>19 Individuals with SCA3/MID (24 at baseline)<br>Age: 46.79 ± 10.15 yr<br>10 Women<br>CA <sub>Gexp</sub> : 71.1 ± 2.49<br>Disease duration: 9.11 ± 6.04 yr<br>SARA: 12.08 ± 5.68<br>INAS: 5.44 ± 2.07<br>SCAFI: 0.46 ± 0.81<br>UHDRS-IV: 20.61 ± 4.05<br><br>19 SCA3/MID controls<br>Age: 46.35 ± 10.58 yr<br>10 Women<br><br>SCA6 data were excluded due to sample size of 7 (10 at baseline) | ROI volume loss progression in different genotypes across time<br>SRM for clinical scales and neuroimaging<br>Correlation between regions with volume loss and clinical variables | 1.5T system<br>Semiautomatic technique; blinded volumetric processing; ROI:<br>1) brain stem subdivided into medulla oblongata, pons, and mesencephalon; 2) cerebellum subdivided into the right and left cerebellar hemispheres and vermis; 3) caudate and putamen nucleus; 4) the cerebrum<br>VBM: SPM8 and the VBM Toolbox 8<br>Percentage change of volume loss: calculated with baseline and follow-up normalized values for each ROI, corrected for visit interval<br>The standardized response mean (SRM): mean score change/standard deviation (SD) of score change. | <b>Semiautomated analysis:</b> longitudinal % normalized volume loss in genotypes compared with controls<br>SCA1: Brain stem: -0.36 ± 0.22, P < .05; Pons: -0.34 ± 0.23, P < .005;<br>Right putamen: -0.86 ± 0.53, P < .05; Left putamen: -0.81 ± 0.53, P < .05; Left caudate: -0.79 ± 0.66, P < .05;<br>Left cerebellar hemisphere: -0.32 ± 0.44, P = .052<br>SCA3/MID:<br>Brain stem: -0.20 ± 0.19 (P < .05); Pons: -0.41 ± 0.6 (P < .005);<br>Right putamen: -0.38 ± 0.33; Left putamen: -0.53 ± 0.36; Left caudate: -0.48 ± 0.38<br>The remaining regions showed no significant interactions or main effects<br>Group vs group: SCA1 showed an increased rate of volume loss in the brain stem (P < .05), left cerebellar hemisphere (P < .05), and putamen (P < .05) compared with SCA3/MID; the degree of change in the pons (P < .0001) was similar in patients with SCA1 and SCA3/MID<br><b>VBM</b><br>SCA1<br>GM volume atrophy in the brain stem, left anterior and posterior cerebellum, and the right putamen and pallidum (P < .001)<br>SCA3/MID<br>The main effect restricted to bilateral putamen and pallidum<br><b>SRM</b><br>Clinical scales with significant changes with time<br>SCA1<br>SARA = 1.2<br>UHDRS-IV = -0.1<br>SCA3/MID SARA = 1.4<br>UHDRS-IV = -0.6<br>MRI volume loss with time<br>SCA1<br>Brain stem: -1.6<br>Pons: -1.5<br>Putamen: -1.3<br>Caudate: -1.2<br>Cerebellum: -0.7<br>SCA3/MID<br>Brain stem: -1.1<br>Pons: -0.9<br>Putamen: -1.5<br>Caudate: -1.6 | Clinical vs MRI findings:<br>CAG <sub>exp</sub> correlated inversely with change on the left (R = -0.370, P < .05) and right cerebellum (R = 0.380, P < .05) in the SCA1 group; the same pattern was found when using VBM data for cerebellum (R = -0.48, P < .005) and pons at the cluster level (R = -0.477, P < .005)<br>Disease duration showed no significant association with changes on the clinical variables or with changes on brain volume loss<br>Association measures between localized volume reduction and the change on the various clinical variables revealed no significant findings | 19 Dropouts (23% of sample), reasons for losses were reported<br>Follow-up was reported to be 2 yr, but authors provided only the period of data collection |

Continued on next page

**On-line Table 3: Continued**

| Author, Year/Country Design/Medical Scenario Population                                                                                                                                                                                                                                                                                                                                                                                                                                                                               | Sample Size                                                                                                                                                                                                                                                                                                                                                                                                                                   | Outcomes                                                                                                                | Acquisition, Postprocessing                                                                                                                                                                                                                                                                                             | Main Findings                                                                                                                                                                                                                                                                                                                                                                                                                                                                                                                                                                                                                                                                                                                                                                                                                                                                                                                                                                                                                                                                                                                                                                                                                                       | Correlations                                                                                                                                                                                                                                                                                                                                                                                                                                                                                                                                                                                                                                                                                                                                                                                                                                                                                                                                                                                                                                                                                                                                                                                                                                                                                                                                                   | Limitations                                                                  |
|---------------------------------------------------------------------------------------------------------------------------------------------------------------------------------------------------------------------------------------------------------------------------------------------------------------------------------------------------------------------------------------------------------------------------------------------------------------------------------------------------------------------------------------|-----------------------------------------------------------------------------------------------------------------------------------------------------------------------------------------------------------------------------------------------------------------------------------------------------------------------------------------------------------------------------------------------------------------------------------------------|-------------------------------------------------------------------------------------------------------------------------|-------------------------------------------------------------------------------------------------------------------------------------------------------------------------------------------------------------------------------------------------------------------------------------------------------------------------|-----------------------------------------------------------------------------------------------------------------------------------------------------------------------------------------------------------------------------------------------------------------------------------------------------------------------------------------------------------------------------------------------------------------------------------------------------------------------------------------------------------------------------------------------------------------------------------------------------------------------------------------------------------------------------------------------------------------------------------------------------------------------------------------------------------------------------------------------------------------------------------------------------------------------------------------------------------------------------------------------------------------------------------------------------------------------------------------------------------------------------------------------------------------------------------------------------------------------------------------------------|----------------------------------------------------------------------------------------------------------------------------------------------------------------------------------------------------------------------------------------------------------------------------------------------------------------------------------------------------------------------------------------------------------------------------------------------------------------------------------------------------------------------------------------------------------------------------------------------------------------------------------------------------------------------------------------------------------------------------------------------------------------------------------------------------------------------------------------------------------------------------------------------------------------------------------------------------------------------------------------------------------------------------------------------------------------------------------------------------------------------------------------------------------------------------------------------------------------------------------------------------------------------------------------------------------------------------------------------------------------|------------------------------------------------------------------------------|
| Jacobi et al, 2013 <sup>30</sup> /Germany, Belgium, Austria, Italy, France, Spain, Hungary, and Poland<br>Case-control/multicenter: 8 European centers<br>Recruits of patients with SCA with the following 3 criteria:<br>● Or sibling or sibling of an individual with SCA1, SCA2, SCA3, or SCA6<br>● Age: 18–50 yr if directly related to individuals with SCA1, SCA2, or SCA3, and 35–70 yr if directly related to individuals with SCA6<br>● No ataxia (SARA < 3)<br>Data were collected between September 2008 and December 2011 | 26 SCA1 carriers<br>Age, 26 yr (range, 22–30 yr)<br>23 Women<br>Estimated time from onset: –11 yr (–14 to –8) yr<br>13 SCA1 noncarriers<br>Age, 28 yr (range, 22–36 yr)<br>8 Women<br>11 SCA6 carriers<br>Age, mean, 4 yr (range, 42–49 yr)<br>6 Women<br>Estimated time from onset: –20 yr (–23 to –16) yr<br>Pooled noncarriers (n = 33)<br>Data from SCA2 and SCA3/MID carriers was excluded due to sample sizes of 4 and 9, respectively. | Differences in volume in semiautomated and VBM analysis between groups and the correlation with disease markers         | 1.5T system<br>VBM7<br>SPM8, VBM8, and the spatially unbiased<br>Infratentorial Toolbox (Version 2.5.3) <sup>c</sup><br>Semiautomated, quantitative volumetry, brain stem volume, cerebellar volume, and total intracranial volume<br>MRI volumetric analysis was performed by 1 investigator blinded to carrier status | Presymptomatic SCA1<br>VBM7<br>GM loss (P < .001) in the medulla oblongata, pons, lobule IX of the cerebellum<br>Semiautomated volumetric analysis (P < .05): Lower brain stem volumes of SCA1 carriers than of pooled noncarriers<br>Presymptomatic SCA6<br>No differences in VBM or semiautomated volumetric analysis between carriers and noncarriers                                                                                                                                                                                                                                                                                                                                                                                                                                                                                                                                                                                                                                                                                                                                                                                                                                                                                            | None                                                                                                                                                                                                                                                                                                                                                                                                                                                                                                                                                                                                                                                                                                                                                                                                                                                                                                                                                                                                                                                                                                                                                                                                                                                                                                                                                           | Only 30% of the studied individuals underwent MRI. No other major limitation |
| de Rezende et al, 2015 <sup>27</sup> /Brazil<br>Case-control/single center, specialized neurology and neurogenetics department<br>Patients with SCA3/MID and healthy controls<br>Data were collected between 2009 and 2013                                                                                                                                                                                                                                                                                                            | 49 Individuals with SCA3/MID<br>Age, 47.7 ± 13.0 yr<br>22 Women<br>Age at onset, 37.5 ± 12.5 yr<br>Disease duration, 10.00 ± 4.7 yr<br>CAG <sub>exp</sub> : 721 ± 42<br>SARA, 14.7 ± 7.3<br>Patients with dystonia (n = 19, 39%)<br>49 Controls<br>Age, 47.5 ± 12.7 yr<br>22 Women                                                                                                                                                            | Differences in cortical thickness and subcortical volumes between groups and its correlation with other disease markers | 3T system<br>Cortical thickness: FreeSurfer software, Version 5.3                                                                                                                                                                                                                                                       | Cortical thickness<br>Vertex-wise analysis<br>Significant reduction in patients with SCA3/MID in left hemisphere: superior frontal precentral cortices (P = .021) (P = .014)<br>Right hemisphere: superior frontal cortex (P = .014)<br>Atlas of Desikan et al <sup>41</sup><br>Significant cortical thinning in patients with SCA3/MID in left hemisphere: middle occipital gyrus, precentral gyrus, anterior transverse temporal gyrus, posterior ramus of the lateral sulcus, inferior part of the precentral sulcus, superior temporal sulcus, middle posterior part of the cingulate gyrus and sulcus, short insular gyri, superior occipital gyrus, angular gyrus, precentral gyrus; posterior ramus of the lateral sulcus, central sulcus, marginal branch of the cingulate sulcus, medial occipitotemporal sulcus, and lingual sulcus<br>Subcortical volumetric analyses<br>Significant reductions in patients with SCA3/MID in left hemisphere: cerebellar WM, cerebellar GM, thalamus, caudate, putamen, pallidum, ventral diencephalon<br>Right hemisphere: cerebellar WM, cerebellar GM, thalamus, caudate, putamen, pallidum, ventral diencephalon, brain stem<br>Both hippocampal were also atrophic in the SCA3/MID group (P < .001) | Cortical data<br>SARA<br>Left precentral gyrus (R = –0.302, P = .035)<br>Anterior transverse temporal gyrus (R = –0.303, P = .034)<br>Superior temporal sulcus (R = –0.354, P = .013)<br>Caudal middle frontal cortex (R = –0.330, P = .02)<br>Paracentral cortex (R = –0.311, P = .03)<br>Transverse temporal cortex (R = –0.346, P = .015)<br>Multiple regression:<br>Age, age at onset, and disease duration were independently correlated with the thickness of the right angular gyrus (R-adjusted = 0.662; P < .001)<br>Left caudal middle frontal cortex (R-adjusted = 0.569; P < .004)<br>Right posterior ramus of the lateral sulcus (R-adjusted = 0.603; P = .001)<br>No correlation between the length of the expanded CAG repeat and thickness measurements<br>Neuropsychological tests not reported; this was not an outcome of interest for this review<br>Subcortical data<br>SARA<br>Brain stem (R = 0.581; P < .001)<br>Left thalamus volume (R = 0.624, P < .001)<br>Ventral diencephalon, both at right (R = 0.575; P < .001) and left (R = 0.641, P < .001)<br>Duration of the disease:<br>Left (R = 0.619, P < .001) and right (R = 0.578, P < .001), ventral diencephalon and right cerebellar white matter (R = 0.543, P = .001)<br>No correlations between subcortical volumes and age, age at onset and CAG <sub>exp</sub> were found | Origin of controls not reported                                              |

Continued on next page



**On-line Table 3: Continued**

| Author, Year/Country Design/Medical Scenario Population                                                                                                                                         | Sample Size                                                                                                                                                                                                     | Outcomes                                                                                                             | Acquisition, Postprocessing                                                                                                                                                                                                                                                                                                                                                                                                                                                  | Main Findings                                                                                                                                                                                                                                                                                   | Correlations                                                                                                                                                                                                                                                                                                                                           | Limitations                                                                                                                         |
|-------------------------------------------------------------------------------------------------------------------------------------------------------------------------------------------------|-----------------------------------------------------------------------------------------------------------------------------------------------------------------------------------------------------------------|----------------------------------------------------------------------------------------------------------------------|------------------------------------------------------------------------------------------------------------------------------------------------------------------------------------------------------------------------------------------------------------------------------------------------------------------------------------------------------------------------------------------------------------------------------------------------------------------------------|-------------------------------------------------------------------------------------------------------------------------------------------------------------------------------------------------------------------------------------------------------------------------------------------------|--------------------------------------------------------------------------------------------------------------------------------------------------------------------------------------------------------------------------------------------------------------------------------------------------------------------------------------------------------|-------------------------------------------------------------------------------------------------------------------------------------|
| Fahl et al, 2014 <sup>33</sup> /Brazil Case-control/single center, specialized neurology and neurogenetics outpatient clinics<br>Consecutive SCA3/MID and healthy age- and sex-matched controls | 48 individuals with SCA3/MID<br>Age, 47.7 ± 12.9 yr<br>22 Women<br>Disease duration, 9.00 ± 4.4 yr<br>CAG <sub>exp</sub> , 70.1 ± 5.4<br>SARA, 14.2 ± 7.1<br>48 Controls<br>Age, 47.7 ± 12.9 yr<br>22 Women     | Differences in the cervical cord area and eccentricity between groups and its correlation with other disease markers | 3T system<br>SpineSeg for the quantitative analyses of the cervical cord; measurements determined from sections obtained perpendicular to the lower limits (base) of the 2nd and 3rd cervical vertebrae<br>CA and CE of the cord were used for analysis<br>FreeSurfer, Version 5.3, was used to segment automatically the cerebellum and calculate its total volume<br>All measurements were performed by a single evaluator, blinded to the clinical status of the subjects | SCA3/MID versus controls<br>CA (49.5 ± 7.3 vs 67.2 ± 6.3 mm <sup>2</sup> , P < .001)<br>CE (0.79 ± 0.06 vs 0.75 ± 0.05, P = .005)                                                                                                                                                               | Disease duration was the only variable associated with CA (R <sup>2</sup> = 0.343, R = -0.629, P = .025) in the multiple variable regression model<br>After covariation for disease duration and cerebellar volume, CA was independently associated with SARA scores; the model explained 49.1% of SARA variance (R = -0.367, P = .010) with cord area | Origin of controls and period of data collection not reported                                                                       |
| Hernandez-Castillo et al, 2015 <sup>36</sup> /Mexico Case-control/Universidad Nacional Autonoma de Mexico<br>Patients with SCA7 with CAG expansions >40; healthy age- and sex-matched controls  | 24 Individuals with SCA7; age, 39.8 ± 15.18 yr<br>10 women<br>Disease duration, range, 1-21 yr<br>CAG <sub>exp</sub> , range, 41-71<br>SARA, range, 4-29.5<br>24 controls<br>Mean age, 38.4 ± 15 yr<br>10 women | Differences in supra- and infratentorial regions between groups and the correlation with SARA                        | 3T system; surface-based analysis; FSL; images corresponding to the GM were aligned to Montreal Neurological Institute-152 standard space by a nonlinear coregistration; GMV images, loaded in Matlab 2014a, <sup>35</sup> and a voxelwise partial correlation were calculated using in-house functions                                                                                                                                                                      | Right anterior cerebellum showed the greatest amount of atrophy, followed by the left posterior cerebellum in SCA7; gray matter decreases in the SCA7 group compared with controls were also seen in the cuneus, precuneus, pre-/postcentral gyri, inferior frontal gyrus, and temporal regions | Significant negative correlations were found between GMV and SARA scores in the SCA7 group; these regions included the bilateral anterior and posterior cerebellum, the left parahippocampal gyrus, bilateral precentral gyri, bilateral cingulate gyri, bilateral insula, and bilateral inferior frontal gyri                                         | Selection; neither information on origin of patients and controls nor period of data collection reported; 95% CIs were not reported |

**Note:**—IACRS indicates Inherited Ataxia Clinical Rating Scale; ICARS, International Cooperative Ataxia Rating Scale; INAS, Inventory of Non-Ataxia Signs; SCAFI, spinocerebellar ataxia functional index; UHDRS, Unified Huntington's Disease Rating Scale; EUROSca, European Integrated Project on Spinocerebellar Ataxias; <http://www.euroasca.org/>; SpineSeg, Spinal Cord Segmentation; <http://www.inic.unicamp.br/app/spineseg/>; CA, cross-sectional area; CE, cross-sectional eccentricity; GMV, gray matter volume; GMD, gray matter density; WMD, white matter density.

<sup>a</sup> Data are shown as mean ± SD on sample size column.

<sup>b</sup> <https://sourceforge.net/p/marsbar/mailman/message/24774013>; and [www.bic.mni.mcgill.ca](http://www.bic.mni.mcgill.ca).

<sup>c</sup> <http://www.diedrichsenlab.org/imaging/suit.htm>.

<sup>d</sup> Diffeomorphic Anatomical Registration Through Exponentiated Lie Algebra.

<sup>e</sup> MathWorks, Natick, Massachusetts; <http://www.diedrichsenlab.org/imaging/suit.htm>.

**On-line Table 4: MR spectroscopy extraction table<sup>a</sup>**

| Author, Year/Country Design/Medical Scenario Population                                                                                                                                                      | Sample Size                                                                                                                                                                                                                                                                                                                                         | Outcomes                                                                                                                                                                                                   | Acquisition, Postprocessing                                                                                                                                                                                                                                                                                                                                                                                                                                                                                                                                                                                                                                                                                                                                                             | Main Findings                                                                                                                                                                                                                                                                                                                                                                                                                 | Correlations                                                                                                                                                                                                                                                                                                                                                                                                                                                                                                                                                                                                                                                                                                                                                                                                                                                                                      | Limitations                                                                                                                                                                                                                                                                                                                                                                                                                                                                                              |
|--------------------------------------------------------------------------------------------------------------------------------------------------------------------------------------------------------------|-----------------------------------------------------------------------------------------------------------------------------------------------------------------------------------------------------------------------------------------------------------------------------------------------------------------------------------------------------|------------------------------------------------------------------------------------------------------------------------------------------------------------------------------------------------------------|-----------------------------------------------------------------------------------------------------------------------------------------------------------------------------------------------------------------------------------------------------------------------------------------------------------------------------------------------------------------------------------------------------------------------------------------------------------------------------------------------------------------------------------------------------------------------------------------------------------------------------------------------------------------------------------------------------------------------------------------------------------------------------------------|-------------------------------------------------------------------------------------------------------------------------------------------------------------------------------------------------------------------------------------------------------------------------------------------------------------------------------------------------------------------------------------------------------------------------------|---------------------------------------------------------------------------------------------------------------------------------------------------------------------------------------------------------------------------------------------------------------------------------------------------------------------------------------------------------------------------------------------------------------------------------------------------------------------------------------------------------------------------------------------------------------------------------------------------------------------------------------------------------------------------------------------------------------------------------------------------------------------------------------------------------------------------------------------------------------------------------------------------|----------------------------------------------------------------------------------------------------------------------------------------------------------------------------------------------------------------------------------------------------------------------------------------------------------------------------------------------------------------------------------------------------------------------------------------------------------------------------------------------------------|
| D'Abreu et al. 2009 <sup>35</sup> /Brazil Case-control/single center Patients with SCA3/MID and healthy controls                                                                                             | 40 Individuals with SCA3/MID Age: 44.6 ± 12.28 yr<br>18 Women<br>Age of onset: 34.6 ± 12.2 yr<br>Disease duration: 9.6 ± 4.7 yr<br>CAG <sub>exp</sub> : 66 (range: 61–75)<br>27 Controls<br>Age: 31.4 ± 13.6 yr                                                                                                                                     | Spectroscopy findings correlated with clinical findings and ICARS score                                                                                                                                    | 2T system<br>Single-voxel 1H-MRS<br>PRESS sequence 16<br>ROI: superior region of the left hemisphere at the level of the corpus callosum (large amount of white matter without the contamination of CSF and gray matter)<br>Spectra postprocessed with the software supplied by the machine manufacturer <sup>b</sup><br>NAA at 2.01 ppm, choline-based compounds at 3.2 ppm, and creatine- and phosphocreatine-containing compounds at 3.0 ppm; we scaled the spectra in relation to creatine values;<br>NAA/Cr and Cho/Cr ratios were used for analyses; MRS analyses were blinded                                                                                                                                                                                                    | H-MRS:<br>Mean NAA/Cr ratios were 1.63 ± 0.41 (range: 1.15–2.76) in SCA3/MID and 1.97 ± 0.51 (1.50–2.92) in the control group (U test = 219.0; P < .001).<br>Mean Cho/Cr ratio in SCA3/MID was 0.93 ± 0.15 (range: 0.7–1.18) and in the control group: 0.97 ± 0.12 (range: 0.7–1.23)<br>There was no significant difference in Cho/Cr ratios<br>4 Subjects were excluded from the MRS analysis due to poor quality of spectra | There was no significant correlation between NAA/Cr ratios and clinical and genetic variables, including disease duration, ICARS score and CAG (P = 2.477 and P = .102)                                                                                                                                                                                                                                                                                                                                                                                                                                                                                                                                                                                                                                                                                                                           | Origin of patients and controls and period of data collection not reported<br>Only 15 patients and 15 controls were age-matched, and only 11 were sex-matched<br>The authors provided data of these 15 age-matched individuals that had similar results; however, these results were not included in the present review due to the small number of patients                                                                                                                                              |
| Lei et al. 2011 <sup>20</sup> /China Case-control/single center; Neurodegenerative Disorders Clinics at a university hospital from 2007–2009 Patients with SCA3/MID and healthy controls matched for age     | 36 Individuals with SCA3/MID<br>18 Women<br>Disease duration: 4.50 ± 2.60 yr<br>CAG <sub>exp</sub> : 75.53 ± 4.3<br>SARA: 10.21 ± 3.56<br>27 Controls<br>Age: 31 ± 7.35 yr<br>14 Women                                                                                                                                                              | Difference between metabolites and ratios between cases and controls and its correlations with other disease markers                                                                                       | 1.5T system<br>Conventional SE was performed to obtain T1WI horizontal axial position, median sagittal position, and coronal position (TR: 838 ms; TE: 12 ms; layer thickness: 6 mm; layer gap: 0; FOV: 230; NEX: 2; matrix: 256 × 256) and FSE T2WI (TR: 4000 ms; TE: 95 ms; echo train: 15; layer thickness: 6 mm; layer gap: 0; FOV: 230; NEX: 2; matrix: 256 × 256) axial images<br>ROI positioning was manual; acquisition included vermis of cerebellum, middle cerebellar peduncle, right-sided cerebellar cortex, and right-sided cerebellar dentate nucleus; voxel size: 15 × 10 × 15 mm<br>SVS-SE: 135 sequences (TR: 1500 ms; TE: 1500 ms; signal acquisition to perform single-voxel MR signals of NAA, Cho, Cr, and the ratios NAA/Cho, NAA/Cr, and Cho/Cr were calculated | NAA/Cr reduced in patients with SCA3/MID in dentate nucleus (P = .003), cerebellar cortex (P = .001), vermis (P < .001), and middle cerebellar peduncle (P < .001)<br>NAA/Cho reduced in patients with SCA3/MID in dentate nucleus (P = .001) and vermis (P < .001)                                                                                                                                                           | NAA/Cr of dentate nucleus was directly correlated with disease duration (R = 0.421, P = .011). CAG <sub>exp</sub> (R = 0.415, P = .012), and SARA score (R = 0.452, P = .006); Middle cerebellar peduncle was inversely correlated with age at onset (R = -0.354, P = 0.034) and directly with SARA (R = 0.954, P = .001)<br>Cho/Cr of dentate nucleus was directly correlated with SARA (R = 0.360, P = .031); cerebellar cortex was inversely correlated with disease duration (R = -0.347, P = .038). CAG <sub>exp</sub> (R = -0.497, P = .002), and SARA (R = 0.389, P = .019)<br>Vermis was directly correlated with SARA (R = 0.954, P = .002)<br>NAA/Cho of cerebellar cortex was directly correlated with disease duration (R = 0.368, P = .027). CAG <sub>exp</sub> (R = 0.562, P < .001) and SARA (R = 0.458, P = .005), vermis was directly correlated with SARA (R = 0.954, P = .010) | No information about blinding for ROI positioning<br>95% CI; were not reported<br>Authors did not comment on the discrepancy in the between-group and correlation analyses, in which reduced spectroscopy ratio regions had direct correlation with clinical data that increase with disease severity, except for Cho/Cr of the cerebellar cortex, which was inversely correlated these variables                                                                                                        |
| Wang et al. 2012 <sup>22</sup> /Taiwan Case-control/single center; Taipei Veterans General Hospital from March 2004–March 2010 Patients with SCA2, SCA3/MID, and SCA6; healthy controls matched for age, sex | 48 Individuals with SCA3/MID (43 patients with SCA3/MID underwent MRI)<br>Age: 48.8 ± 11.4 yr<br>Disease duration: 8.7 ± 6.2 yr<br>CAG <sub>exp</sub> : 73.1 ± 4.0<br>Age of onset: 40.1 ± 10.5 yr<br>SARA: 14.1 ± 8.0<br>44 Controls<br>Age: 51.1 ± 18.0 yr<br>Data from SCA2 and SCA6 were excluded due to sample sizes of 12 and 8, respectively | Outcomes of interest: difference among groups in NAA/Cr in the vermis (denoted V-NAA), right cerebellar hemisphere (R-NAA), and left (L-NAA) cerebellar hemisphere; and Cho/Cr ratio in these same regions | 1.5T system<br>Axial T1-weighted (TR: 8.58 ms; TE: 3.62 ms; TI: 400 ms; section thickness: 1.5 mm)<br>Axial, T2-weighted, fast SE sequence (TR: 4000 ms; TE: 236.5 ms; section thickness: 5 mm)<br>Single-voxel analysis in cerebellar vermis and hemispheres; metabolite intensity ratios were calculated automatically at the end of each single-voxel acquisition                                                                                                                                                                                                                                                                                                                                                                                                                    | Spectroscopy<br>NAA/Cr ratio decreased in the cerebellar hemispheres and the vermis in SCA3/MID (P < .001)<br>V-Cho/Cr reduction (P = .025), with no changes in cerebellar hemispheres in SCA3/MID                                                                                                                                                                                                                            | Clinical Measurements<br>Age, disease duration, and age of onset, CAG repeats<br>R-NAA/Cr (R = -0.553; P < .001), V-NAA/Cr (R = -0.748; P < .001), and L-NAA/Cr (R = -0.556; P < .001) presented an inverse correlation with SARA<br>No correlation was found for MRS ratios with CAG <sub>exp</sub><br>R-NAA/Cr decrease with age in controls (R = -0.352, P < .05) and patients with SCA3/MID (R = -0.522, R = .001); V-NAA/Cr (R = -0.364, P < .05) and L-NAA/Cr (R = -0.566, R = .001) decrease with age only in patients with SCA3/MID<br>Control subjects<br>R-NAA ratio decreased with increasing age (R = -0.352, P = .05);<br>L-NAA (R = -0.320 and P > .05) and V-NAA (R = 0.043 and P > .05) ratios exhibited no change with age (not normally distributed)                                                                                                                            | Sex demographic data were not described; demographic data were reported for all the screened population in the study, and not only for the individuals who underwent MRS<br>Some patients had repeat MRS measures in the study; however, the exact number of patients and intervals was not reported<br>Many of the performed analyses were based on statistical models; the study did not evaluate the target parameter as disease progression with time and MRS findings in presymptomatic individuals |

Continued on next page

**On-line Table 4: Continued**

| Author, Year/Country Design/Medical Scenario Population                                                                                                                                                                                             | Outcomes                                                                                                                                                                                    | Acquisition, Postprocessing                                                                                                                                                                                                                                                                                                                                                                                                                                                                                                                                                                                                                                                                                                                                                                                                                                                                                                                                                           | Main Findings                                                                                                                                                                                                                                                                                                                                                                                                                                                                                                                                                                                                                                                                                                                                                                                                                                                                                                                                                                                                                                                                     | Correlations                                                                                                                                                                                                                                                                                                                                                                                                                                   | Limitations                                                                                                                                                                                                                                                 |
|-----------------------------------------------------------------------------------------------------------------------------------------------------------------------------------------------------------------------------------------------------|---------------------------------------------------------------------------------------------------------------------------------------------------------------------------------------------|---------------------------------------------------------------------------------------------------------------------------------------------------------------------------------------------------------------------------------------------------------------------------------------------------------------------------------------------------------------------------------------------------------------------------------------------------------------------------------------------------------------------------------------------------------------------------------------------------------------------------------------------------------------------------------------------------------------------------------------------------------------------------------------------------------------------------------------------------------------------------------------------------------------------------------------------------------------------------------------|-----------------------------------------------------------------------------------------------------------------------------------------------------------------------------------------------------------------------------------------------------------------------------------------------------------------------------------------------------------------------------------------------------------------------------------------------------------------------------------------------------------------------------------------------------------------------------------------------------------------------------------------------------------------------------------------------------------------------------------------------------------------------------------------------------------------------------------------------------------------------------------------------------------------------------------------------------------------------------------------------------------------------------------------------------------------------------------|------------------------------------------------------------------------------------------------------------------------------------------------------------------------------------------------------------------------------------------------------------------------------------------------------------------------------------------------------------------------------------------------------------------------------------------------|-------------------------------------------------------------------------------------------------------------------------------------------------------------------------------------------------------------------------------------------------------------|
| Limg et al. 2012 <sup>21</sup> /Taiwan<br>Case-control, single center, specialized neurology department.<br>Patients with SCA1, SCA2, SCA3/MID, SCA6, SCA7, and SCA-C healthy, age- and sex-matched controls<br>Baseline collection data: 2004–2010 | Comparison of the metabolic parameters on MRS between patients with SCA and healthy controls and between SCA subtypes and MSA-C<br>Correlation of the MRS ratios with other disease markers | 1.5T system<br>MRI acquisition protocol for axial T1-weighted 3D fast spoiled gradient-recalled acquisition in steady-state images (TR, 8.58 ms; TE, 3.62 ms; TI, 400 ms; voxel resolution, 0.75 × 0.75 × 1.5 mm) and an axial T2 fast SE sequence (TR, 4000 ms; TE, 236.5 ms; voxel resolution, 348 × 312)<br>Proton MRS was recorded in cerebellar hemispheres and cerebellar vermis by using single-voxel stimulated echo acquisition mode sequence<br>Metabolite-intensity ratios: automatically calculated at the end of each single-voxel acquisition, including NAA/Cr and Cho/Cr                                                                                                                                                                                                                                                                                                                                                                                              | SCA3/MID<br>Cerebellar hemispheres ( $P < .05$ )<br>NAA/Cr: $0.84 \pm 0.14$<br>NAA/Cho: $1.25 \pm 0.16$<br>Cerebellar vermis ( $P = .05$ )<br>NAA/Cr: $0.79 \pm 0.1$<br>NAA/Cho: $1.20 \pm 0.13$<br>Early-stage (SARA $< 10$ ) SCA3/MID ( $n = 20$ )<br>Cerebellar hemispheres ( $P < .0005$ )<br>NAA/Cr: $0.9 \pm 0.1$<br>NAA/Cho: $1.3 \pm 0.1$<br>Cerebellar vermis<br>NAA/Cr: $0.8 \pm 0.1$ ( $P < .002$ )<br>NAA/Cho: $1.2 \pm 0.1$ ( $P < .007$ )<br>MRS-c reduced relative metabolite concentrations in patients with SCA3/MID compared with controls<br>NAA/Cr + PCr ( $0.76 \pm 0.15$ vs $0.98 \pm 0.19$ ; $P = .001$ )<br>NAA + NAA/Cr + PCr ( $0.88 \pm 0.15$ vs $1.28 \pm 0.41$ ; $P = .001$ )<br>Glu/Cr + PCr ( $0.37 \pm 0.09$ vs $0.47 \pm 0.15$ ; $P = .035$ )<br>No difference in Glu/Cr + PCr ( $0.35 \pm 0.10$ vs $0.44 \pm 0.17$ ; $P = .11$ )<br>PCh + PCr ( $0.22 \pm 0.06$ vs $0.25 \pm 0.08$ ; $P = .13$ )<br>GPC + PCh/Cr + PCr ( $0.24 \pm 0.04$ vs $0.27 \pm 0.05$ ; $P = .098$ )<br>mins/Cr + PCr ( $0.83 \pm 0.20$ vs $0.81 \pm 4.09$ ; $P = 1.00$ ) | Inverse correlation between MRS ratios (NAA/Cr, NAA/Cho, Cho/Cr) in the cerebellar hemispheres and vermis) and SARA scores in SCA3/MID; the lower the metabolite ratio, the higher the SARA scores<br>NAA/Cho correlated with disease duration ( $P = .007$ in the cerebellar hemispheres; $P = .006$ in the vermis); disease duration did not correlate with NAA/Cr or Cho/Cr in cerebellar hemispheres or vermis                             | Sex distribution not described<br>The R and P values for the correlations between MRS and SARA in the different SCAs were not provided<br>The correlations between MRS and disease duration is provided with the overall data and not for each SCAs subtype |
| Lopes et al. 2013 <sup>26</sup> /Brazil<br>Case-control, exploratory study, single center<br>Patients with SCA3/MID and healthy controls matched for age, sex, and educational level                                                                | Outcomes of interest: correlation between the cognitive findings and GM volume, WM integrity, cerebellar metabolite concentration, clinical and genetic data                                | 3T system<br>MRS, spectra acquired with a PRESS sequence (TR/TE, 2000/144 ms; 128 scans; 2-kHz bandwidth; 1024 data points), using a single voxel of 1.5 cm <sup>3</sup> placed over the white matter in the left cerebellum<br>Quantification of the spectra performed with software LCMModel <sup>27</sup><br>Evaluated metabolites: NAA, NAA + NAA + NAAg, total creatine (Cr + PCr), Glu, Glu + Glx, PCh, PCh + GPC + PCh, and mins                                                                                                                                                                                                                                                                                                                                                                                                                                                                                                                                               | MRS-c and cognitive test correlations were not reported; these were not an outcome of interest for this review<br>No significant correlation between the cognitive findings and CAG expansion length, duration and disease severity were found; the correlation between VBM, DTI, and MRS-c findings and CAG expansion length, duration, and disease severity was not performed                                                                                                                                                                                                                                                                                                                                                                                                                                                                                                                                                                                                                                                                                                   | Origin of patients and controls and period of data collection not reported<br>6 (8%) Cases were excluded from MRS-c analysis, without reason<br>Some analyses were not corrected for multiple comparisons due to the exploratory nature of the study                                                                                                                                                                                           |                                                                                                                                                                                                                                                             |
| Adanyeguh et al. 2015 <sup>19</sup> /France<br>Case-control, single center<br>Patients with SCA1, SCA2, SCA3/MID, and SCA7<br>Healthy, age- and sex-matched controls<br>Baseline collection data: 2004–2010                                         | Outcomes of interest: Difference in vermis and pons metabolites in each SCA versus control<br>Correlation between the metabolites and SARA scores, CAG repeat length, and disease duration  | 3T system<br>MRS, modified semiadiabatic localization by adiabatic selective refocusing (semi-LASER) sequence<br>3D T1-weighted volumetric images (TR, 2530 ms; TE, 53.65 ms; 1-mm isotropic; FOV, 256 × 176 mm <sup>2</sup> ; matrix size, 256 × 256) were acquired for spatial noise localization and localization of brain volume; shimming was performed on a 25 × 10 × 25 mm <sup>3</sup> was performed on VOI in the vermis, and a 16 × 16 × 16 mm <sup>3</sup> VOI in the pons using a fast automatic shimming technique with echo-planar signal trains using a 10 × 10 × 10 mm <sup>3</sup> VOI<br>FASTEST <sup>28</sup> NAA<br>Spectral processing and metabolite quantification<br>LC Model, with the following metabolite profile: taurine, creatine, aspartate, creatine, GABA, GPC, PCh, phosphocreatine, glucose, glutamine, Glu, glutathione, myoinositol, scyllo-inositol, lactate, NAA, NAAg, phosphorylcholine, taurine, and experimentally measured macromolecules | SCA3/MID Vermis:<br>Reduced NAA ( $P < .001$ )<br>Glu ( $P < .01$ )<br>Increased mins ( $P < .001$ )<br>Cr ( $P < .001$ )<br>Pons: Reduced NAA ( $P < .001$ )<br>Glu ( $P < .01$ )<br>Increased mins ( $P < .001$ )<br>Cr ( $P < .05$ )                                                                                                                                                                                                                                                                                                                                                                                                                                                                                                                                                                                                                                                                                                                                                                                                                                           | A strong inverse correlation was found between SARA scores and NAA in SCA3/MID pons ( $R^2 = 0.667$ ; $P = .002$ )<br>Cr also strongly correlated with SARA scores in SCA3/MID pons ( $R^2 = 0.414$ ; $P = .039$ )<br>SARA scores correlated with mins in the pons of patients with SCA3/MID ( $R^2 = 0.470$ ; $P = .071$ )<br>CAG <sub>exp</sub> and disease duration did not correlate with the concentration of any neurochemical evaluated | No major                                                                                                                                                                                                                                                    |
| 32 Controls (26 analyzed with MRS-c)<br>Age, 51 ± 12 yr<br>17 Women                                                                                                                                                                                 | 21 Individuals with SCA3/MID<br>Age, 51 ± 12 yr<br>12 Women<br>Disease duration, 9 ± 5 yr<br>CAG <sub>exp</sub> , 69 ± 6                                                                    | 33 Controls<br>Mean age, 48 ± 13 yr<br>18 Women<br>Data from SCA1, 2, and 7 were excluded due to sample sizes of 16, 12, and 12                                                                                                                                                                                                                                                                                                                                                                                                                                                                                                                                                                                                                                                                                                                                                                                                                                                       |                                                                                                                                                                                                                                                                                                                                                                                                                                                                                                                                                                                                                                                                                                                                                                                                                                                                                                                                                                                                                                                                                   |                                                                                                                                                                                                                                                                                                                                                                                                                                                |                                                                                                                                                                                                                                                             |

**Note**—MRS-c indicates MR spectroscopy cerebellum; PRESS, point-resolved spectroscopic sequence; SE, spin-echo; PCh, phosphorylcholine; LASER, localization by adiabatic selective refocusing; FASTESTMAP <https://www.cmrr.umn.edu/downloads/fastmap/fastestmap.pdf>; V-NAA, NAA/Cr in the vermis; R-NAA, NAA/Cr in the right cerebellar hemisphere; L-NAA, NAA/Cr in the left cerebellar hemisphere; MSA-C, multiple system atrophy, cerebellar type; NAAg, N-acetyl-aspartyl-glutamate; GPC, glycerophosphorylcholine.

<sup>a</sup> Data are shown as mean ± SD on sample size column.

<sup>b</sup> 2T Prestige; Elscint Haifa, Israel.

<sup>c</sup> <http://www.lcmmodel.com/>.

**On-line Table 5: DTI extraction table<sup>a</sup>**

| Author, Year/Country Design/Medical Scenario Population                                                                                                                                                      | Sample Size                                                                                                                                                                                             | Outcomes                                                                                                           | Acquisition, Postprocessing                                                                                                                                | Main Findings                                                                                                                                                                                                                                                                                                                                                                                                                                                                                                                                                                                                                                                                                                                                                                                                                        | Correlations                                                                                                        | Limitations                                                                                                               |
|--------------------------------------------------------------------------------------------------------------------------------------------------------------------------------------------------------------|---------------------------------------------------------------------------------------------------------------------------------------------------------------------------------------------------------|--------------------------------------------------------------------------------------------------------------------|------------------------------------------------------------------------------------------------------------------------------------------------------------|--------------------------------------------------------------------------------------------------------------------------------------------------------------------------------------------------------------------------------------------------------------------------------------------------------------------------------------------------------------------------------------------------------------------------------------------------------------------------------------------------------------------------------------------------------------------------------------------------------------------------------------------------------------------------------------------------------------------------------------------------------------------------------------------------------------------------------------|---------------------------------------------------------------------------------------------------------------------|---------------------------------------------------------------------------------------------------------------------------|
| Guimarães et al. 2013 <sup>34</sup> /Brazil<br>Case-control/single center; specialized neurology department<br>Patients with SCA3/MID and healthy age and sex matched controls<br>Collection data: 2009–2011 | 38 Individuals with SCA3/MID<br>Age: 40.38 ± 12.12 yr<br>17 Women<br>CA <sub>Gexp</sub> : 68.08 ± 4.5<br>ICARS: 32.08 ± 14.01<br>SARA: 14.65 ± 7.33<br>38 Controls<br>Age: 46.86 ± 12.07 yr<br>18 Women | Differences in FA, AD, RD, and MD in different areas between groups and the correlation with other disease markers | 3T system<br>DTI via a 32-direction noncollinear echo-planar sequence<br>Data processing: Tract-Based Spatial Statistics (TBSS; FSL software) <sup>b</sup> | MD:<br>No significant differences were found between groups<br>FA:<br>Reduction ( $P < .05$ ) in SCA3/MID: Brain stem: including pons, midbrain; bilateral cerebellum: anterior lobe, right posterior lobe, nodule, culmen, dentate, fastigial, lingual, and superior, middle, and inferior cerebellar peduncles<br>RD: increased ( $P < .01$ ) in SCA3/MID: Brain stem: pons, midbrain, Bilateral cerebellum: anterior lobe, cerebellum posterior lobe, culmen, fastigium, dentate, tonsil, lingual, pyramids, uvula, declive, and cerebellar peduncles.<br>Supratentorial: thalamus, bilateral cerebral WM, and frontal, temporal and parietal lobes<br>AD: increased ( $P < .01$ ) in SCA3/MID: Brain stem: pons and midbrain<br>Bilateral cerebellum: anterior and posterior lobes, culmen, fastigium, lingual<br>Right thalamus | FA Pons: correlation between FA and disease duration ( $R = 0.4$ , $P = .01$ )<br>No other significant correlations | 95% CIs were not reported<br>The magnitude of the correlations with other markers was not provided, only the significance |

**Note:**—MD indicates mean diffusivity.

<sup>a</sup> Data are shown as mean ± SD on sample size column.

<sup>b</sup> <http://fsl.fmrib.ox.ac.uk/fsl/fslwiki/TBSS>.

**On-line Table 6: Other MRI methods extraction table**

| Author, Year/Country Design/Medical Scenario Population                                                                                                                                                                                                                                                                      | Sample Size                                                                                                                                                                                                                                                       | Outcomes                                                                                                           | Acquisition, Postprocessing                                                                                                                                                                                                                                                                                                                                                                                                                                                                                                                                                                                                                                                                                                                                                                                                                                                                                                                                                                                                                             | Main Findings                                                                                                                                                                                                                                                                                                                                                                                                                                                                                                              | Correlations                                                                                                                                                                                                                                                                                                                                                                                                                                                                                                                                                                                                                                                                                                        | Limitations                                                                                                                                                                                                                                                                                                                                        |
|------------------------------------------------------------------------------------------------------------------------------------------------------------------------------------------------------------------------------------------------------------------------------------------------------------------------------|-------------------------------------------------------------------------------------------------------------------------------------------------------------------------------------------------------------------------------------------------------------------|--------------------------------------------------------------------------------------------------------------------|---------------------------------------------------------------------------------------------------------------------------------------------------------------------------------------------------------------------------------------------------------------------------------------------------------------------------------------------------------------------------------------------------------------------------------------------------------------------------------------------------------------------------------------------------------------------------------------------------------------------------------------------------------------------------------------------------------------------------------------------------------------------------------------------------------------------------------------------------------------------------------------------------------------------------------------------------------------------------------------------------------------------------------------------------------|----------------------------------------------------------------------------------------------------------------------------------------------------------------------------------------------------------------------------------------------------------------------------------------------------------------------------------------------------------------------------------------------------------------------------------------------------------------------------------------------------------------------------|---------------------------------------------------------------------------------------------------------------------------------------------------------------------------------------------------------------------------------------------------------------------------------------------------------------------------------------------------------------------------------------------------------------------------------------------------------------------------------------------------------------------------------------------------------------------------------------------------------------------------------------------------------------------------------------------------------------------|----------------------------------------------------------------------------------------------------------------------------------------------------------------------------------------------------------------------------------------------------------------------------------------------------------------------------------------------------|
| <b>Relaxometry</b><br>Guimarães et al, 2013 <sup>24</sup> /Brazil<br>Case-control/single center; specialized neurology department<br>Patients with SCA3/MJD and healthy age- and sex-matched controls<br>Collection data: 2009–2011                                                                                          | 38 SCA3/MJD individuals<br>Age: 40.38 ± 12.12 yr<br>17 Women<br>CAG <sub>exp</sub> : 68.08 ± 4.5<br>ICARS: 32.08 ± 14.01<br>SARA: 14.65 ± 7.33<br>38 Controls<br>Age: 46.86 ± 12.07 yr<br>18 Women                                                                | Differences in T2 relaxation time in different areas between groups and the correlation with other disease markers | 3T system<br>T2-relaxometry images, acquired with a multiecho T2-weighted sequence in a plane perpendicular to the long axis of the hippocampus; 36 sections with 3-mm thickness<br>After voxel 3D medical image visualization and interactive volume segmentation; software from UNICAMP <sup>b</sup> was used to convert, visualize, and segment the ROIs in the cerebellar WM bilaterally; a circular ROI was placed at each structure and the T2 relaxation times were automatically calculated                                                                                                                                                                                                                                                                                                                                                                                                                                                                                                                                                     | Decreased in the WM of the right cerebellar hemisphere (88.8 × 82.2 ms; <i>P</i> = .032)<br>No other differences were observed                                                                                                                                                                                                                                                                                                                                                                                             | No significant correlation between T2 relaxation times and other disease markers                                                                                                                                                                                                                                                                                                                                                                                                                                                                                                                                                                                                                                    | 95% CIs were not reported<br>The magnitude of the correlations with other markers was not provided, only the significance                                                                                                                                                                                                                          |
| <b>MRI perfusion</b><br>Xing et al, 2014 <sup>27</sup> /China<br>Case-control/single center; specialized neurology and genetics departments<br>Symptomatic and presymptomatic individuals with SCA3/MJD; healthy age- and sex-matched controls; all individuals were Han Chinese<br>Collection data: July 2012–February 2013 | 22 Individuals with SCA3/MJD<br>Age: 43.55 ± 5.86 yr<br>9 Women<br>25 Controls<br>Age: 38.44 ± 12.31 yr<br>16 Presymptomatic individuals with SCA3/MJD<br>Age: 29.56 ± 8.39 yr<br>8 Women<br>23 Controls to presymptomatic SCA3/MJD group<br>Age: 33.3 ± 10.19 yr | rCBF maps to evaluate cerebral perfusion with ASL MRI perfusion-weighted imaging                                   | 3T system<br>Axial and coronal T2-weighted images; TR: 4480 ms; TE: 120 ms; FOV: 240; section thickness: 5 mm; interslice gap: 1.5 mm; and matrix: 320 × 288; sagittal T1-weighted images; TR: 2650 ms; TE: 24 ms; FOV: 240; section thickness: 5 mm; intersection gap: 1.0 mm; and matrix: 320 × 256; FAIR sequence of the ASL; flip angle: 90°; TR: 3500 ms; TE: 16.1 ms; FOV: 240; matrix: 96 × 96; no gap; section thickness: 1.5 mm<br>The ASL perfusion MRI results were analyzed with FuncTool perfusion software <sup>c</sup> following a general kinetic model<br>The ROI in the bilateral precentral gyrus and cerebellar peduncle was 36 voxels; the ROI in the bilateral frontal white matter, posterior limb of the internal capsule, cerebellar white matter, and cerebellar cortex was 48 voxels; the ROIs that outlined the pons and bilateral cerebellar dentate nucleus were hand drawn on the FAIR images that showed the largest sizes of these regions<br>Single physician blinded to the clinical data performed all measurements | rCBF of pons, dentate nucleus, and cerebellar cortex was significantly lower in the patients with SCA3/MJD than in the control group<br>rCBF of dentate nucleus and cerebellar cortex was significantly lower in the presymptomatic individuals with SCA3/MJD than in the control group<br>No significant difference was found between the rCBF of the 11 symptomatic (age: 39.18 ± 3.54 yr) and 9 age-matched presymptomatic (age: 35.11 ± 6.15 yr) individuals with SCA3/MJD                                             | Not performed                                                                                                                                                                                                                                                                                                                                                                                                                                                                                                                                                                                                                                                                                                       | Correlation with other disease markers was not performed to further validate the findings<br>The number of subjects changed according to the comparison, with insufficient power to compare presymptomatic and symptomatic individuals with SCA3/MJD<br>The number of families was not provided; CAG <sub>exp</sub> repeat number was not provided |
| <b>FD analysis</b><br>Wang et al, 2012 <sup>22</sup> /Taiwan<br>Case-control/single center; specialized hospital<br>Healthy age- and sex-matched controls<br>Collection data: 2005 to February 2012                                                                                                                          | 48 Individuals with SCA3/MJD<br>Age: 48.13 ± 11.7 yr<br>21 Women<br>50 Controls<br>Age: 48.24 ± 13.95 yr<br>25 Women                                                                                                                                              | FD analysis of cerebral and cerebellar cortex and the correlation with disease parameters, MMSE, and EEG           | 1.5T system<br>T1-weighted image of each participant was reformatted into an axial image and converted to the Analyze format by using MRICro <sup>d</sup> software; normalization process was conducted using DiffeoMap <sup>e</sup><br>Data processing was conducted using the SPM5 toolbox, IBA-SPM <sup>f</sup> toolbox in Matlab 7.0 software<br>Fractal analysis: 3D box-counting method of 97 regions of gray matter from the entire brain                                                                                                                                                                                                                                                                                                                                                                                                                                                                                                                                                                                                        | 3D-FD values of the cerebellar cortex and cerebellar cortex of the patients with SCA3/MJD were decreased<br>3D-FD analysis indicated that 37 parcellated regions of the cerebellar and cerebellar cortices exhibited significant regional variation in patients with SCA3 compared with the controls<br>Among the parcellated regions, 32 were located in the cerebellar cortex and 5 were located in the cerebellar cortex; the posterior lobe of the cerebellar cortex showed significant decrease in patients with SCA3 | Significant correlation between decreased 3D-FD values of both the cerebellar and cerebellar cortices and disease duration; significant correlations ( <i>P</i> < .05) were found between disease duration and the 3D-FD values of 37 specific regions, including the anterior and posterior lobes of the cerebellar cortex; and frontal, parietal, occipital, and temporal lobes; and limbic and subcortical regions of the cerebellar cortex<br>Significant correlation between the 3D-FD values of the cerebellar cortex and SARA scores ( <i>r</i> = -0.3346, <i>P</i> = .023); the mean 3D-FD values of the patients with SCA3/MJD at the early stage were greater than those at the late stage of the disease | The number of families was not provided; CAG <sub>exp</sub> repeat number was not provided                                                                                                                                                                                                                                                         |

**Note:**—EEG indicates electroencephalogram; MMSE, Mini-Mental State Examination; FD, fractal dimension; rCBF, regional cerebral blood flow; ASL, arterial spin-labeling; FAIR, flow-sensitive alternating inversion recovery.

<sup>a</sup> Data are shown as mean ± SD on sample size column.

<sup>b</sup> UNICAMP software; <https://sourceforge.net/projects/unicamp/>.

<sup>c</sup> GE Healthcare, Milwaukee, Wisconsin.

<sup>d</sup> <http://www.mccauslandcenter.sc.edu/micrro/micrro/micro.html>.

<sup>e</sup> <https://www.mristudio.org>.

<sup>f</sup> <http://www.thomaskoenig.ch/Lester/ibaspm.htm>.
